# Supplementary material
Source: Royal Society of Chemistry journal article supplement (doi:10.1039/d6cc01319h)
Supplement: d6cc01319h1.pdf [file d6cc01319h1.pdf]

*Supporting Information*

**Unlocking efficient near-infrared circularly polarized phosphorescence reaching 800 nm via rational molecular engineering of cyclometalated Pt(II) complexes**

Shilin Gu,<sup>†</sup> Dongsheng Li,<sup>†</sup> Deng Long,<sup>†</sup> Xinglin Yu,<sup>†</sup> Wentao Li,<sup>\*,†</sup> Sihan Ma,<sup>\*,†</sup> and Peng Tao<sup>\*,‡</sup>

<sup>†</sup>Institute of Advanced Optoelectronic Materials and Technology, College of Big Data and Information Engineering, Guizhou University, Guiyang 550025, P. R. China.

<sup>‡</sup>Department of Applied Biology and Chemical Technology and Research Institute for Smart Energy, The Hong Kong Polytechnic University, Hung Hom, Hong Kong, P. R. China; The Hong Kong Polytechnic University Shenzhen Research Institute, Shenzhen 518057, P. R. China.

\*Corresponding Emails: wtli@gzu.edu.cn (Wentao Li); shma@gzu.edu.cn (Sihan Ma); pengtao@polyu.edu.hk (Peng Tao)

## Materials and Methods

The information of the purchased chemicals used in this work.

| Chemical                                           | CAS No.     | Purity | Supplier                            |
|----------------------------------------------------|-------------|--------|-------------------------------------|
| 1-chloroisoquinoline                               | 19493-44-8  | 98%    | Aladdin                             |
| 4-fluorophenylboronic acid                         | 214360-58-4 | 98%    | Aladdin                             |
| 1-chloroisoquinoline-4-carbonitrile                | 53491-80-8  | 98%    | Aladdin                             |
| 1-benzothiophen-2-ylboronic acid                   | 98437-23-1  | 98%    | Aladdin                             |
| Pd(PPh <sub>3</sub> ) <sub>4</sub>                 | 14221-01-3  | 99%    | Aladdin                             |
| K <sub>2</sub> PtCl <sub>4</sub>                   | 10025-99-7  | 98+%   | Aladdin                             |
| ( <i>R</i> )-4-phenyl-1,3-thiazolidine-2-thione    | 110199-18-3 | 98%    | Aladdin                             |
| ( <i>S</i> )-4-phenyl-1,3-thiazolidine-2-thione    | 185137-29-5 | 98%    | Aladdin                             |
| ferrocene                                          | 102-54-5    | 98%    | Aladdin                             |
| tetra- <i>n</i> -butylammonium hexafluorophosphate | 3109-63-5   | 98%    | Aladdin                             |
| CH <sub>3</sub> CN                                 | 75-05-8     | 98%    | Aladdin                             |
| ethyl acetate                                      | 141-78-6    | 98%    | Shanghai Titan Scientific Co., Ltd. |
| <i>n</i> -hexane                                   | 110-54-3    | 98%    | Shanghai Titan Scientific Co., Ltd. |
| K <sub>2</sub> CO <sub>3</sub>                     | 584-08-7    | 99.5%  | Shanghai Titan Scientific Co., Ltd. |
| Na <sub>2</sub> SO <sub>4</sub>                    | 7757-82-6   | 99%    | Shanghai Titan Scientific Co., Ltd. |
| 2-ethoxyethanol                                    | 110-80-5    | 99%    | Shanghai Titan Scientific Co., Ltd. |
| isopropanol                                        | 67-63-0     | 98%    | Aladdin                             |
| diethyl ether                                      | 60-29-7     | 99.9+% | Aladdin                             |
| methanol                                           | 67-56-1     | 99.8+% | Bide Pharmatech Co., Ltd.           |
| ethanol                                            | 64-17-5     | 99.5%  | Aladdin                             |
| toluene                                            | 108-88-3    | 99.5%  | Aladdin                             |

The instrumental information used for characterizations in this work.

| <b>Characterization items</b>                                                        | <b>Type</b>                       | <b>Manufacturer</b>   |
|--------------------------------------------------------------------------------------|-----------------------------------|-----------------------|
| $^1\text{H}$ , $^{13}\text{C}\{^1\text{H}\}$ , and $^{19}\text{F}\{^1\text{H}\}$ NMR | AVANCE III HD, 400/600 MHz        | Bruker, Germany       |
| HRMS (ESI)                                                                           | Agilent 6540 Quadrupole-TOF LC/MS | Agilent Technologies  |
| Elemental analysis                                                                   | VARIO EL cube                     | Elementar, Germany    |
| UV-Vis absorption spectra                                                            | LAMBDA 950                        | Perkin Elmer USA      |
| Photoluminescence spectra                                                            | FLS-1000                          | Edinburgh, USA        |
| Photoluminescence quantum yield                                                      | FLS-1000                          | Edinburgh, USA        |
| Lifetime                                                                             | FLS-1000                          | Edinburgh, USA        |
| CD spectra                                                                           | CD <i>J</i> -1500                 | Jasco, Japan          |
| Circularly polarized luminescence spectra                                            | CPL-300                           | Jasco, Japan          |
| CCD X-ray single crystal diffractometer                                              | Bruker D8 VENTURE                 | Bruker, Germany       |
| Electrochemical workstation                                                          | CHI600E                           | CH Instruments, China |

## General Experimental Details

**Photophysical Measurements.** The UV-Vis absorption spectra were recorded on a Perkin Elmer LAMBDA 950 UV-Vis spectrophotometer (Perkin Elmer, Waltham, MA, USA), and the optical HOMO–LUMO energy gaps of binuclear Pt(II) complexes **(R,S,R)/(S,R,S)-Pt1/Pt1** were calculated by the UV-Vis edge absorption ( $\lambda_{\text{edge}} = 629\text{-}774$  nm). Steady-state emission experiments at room temperature were measured on an Edinburgh FLS-1000 spectrometer. Excited-state lifetime studies were performed with an Edinburgh FLS-1000 spectrometer with a hydrogen-filled excitation source. The data were analyzed by iterative convolution of the luminescence decay profile with the instrument response function using a software package provided by Edinburgh Instruments. Photoluminescence quantum yields (PLQY) of the complexes were determined through an absolute method by employing an integrating sphere. The solution was degassed by three freeze-pump-thaw cycles. Circular dichroism (CD) spectra were measured on a Jasco *J*-1500 circular dichroism spectrometer with a scan speed of 100 nm/min. The circularly polarized luminescence (CPL) spectra were measured on a Jasco CPL-300 spectrophotometer based on ‘Continuous’ scanning mode at 100 nm/min scan speed. The test mode adopts “Slit” mode with the Ex and Em slit width 2500  $\mu\text{m}$  and the digital integration time (D.I.T.) is 2.0 s with multiple accumulations (10 times) and their  $|g_{\text{lum}}|$  values were read from the curves recorded with the software bundled on the equipment.

**X-ray Crystallographic Analysis.** The single crystals of **(R,S,R)/(S,R,S)-Pt1/Pt2** were obtained from the solution mixture of dichloromethane and *n*-hexane. The X-ray diffraction data were collected on a Bruker Smart CCD Apex DUO diffractometer with graphite monochromated Mo  $K_{\alpha}$  radiation ( $\lambda = 0.71073$  Å) using the  $\omega$ - $2\theta$  scan mode. The data were corrected for Lorentz and polarization effects. The structure was solved by direct methods and refined on  $F^2$  by full-matrix least-squares methods using SHELXTL-2000.<sup>1-3</sup> All calculations and molecular graphics were carried out on a computer using the SHELX-2000 program package and Mercury. Crystallographic data for the structural analyses have been deposited with the Cambridge Crystallographic Data Center (CCDC). CCDC reference numbers for **(R,S,R)/(S,R,S)-Pt1/Pt2** are 2526096, 2526097, 2526098, and 2526099, respectively. Copies

of this information can be obtained free of charge from The Director, CCDC, 12 Union Road, Cambridge, CB2 1EZ, UK (Fax: +441223336033; E-mail: deposit@ccdc.cam.ac.uk, or www: <http://www.ccdc.cam.ac.uk>).

**Electrochemical measurement.** Cyclic voltammetry measurements were carried out in CH<sub>3</sub>CN (5×10<sup>-4</sup> M) with a three-electrode cell configuration consisting of platinum working and counter electrodes and a Ag/AgCl (0.01 M in CH<sub>3</sub>CN) reference electrode at room temperature. Tetra-*n*-butylammonium hexafluorophosphate (Bu<sub>4</sub>NPF<sub>6</sub>, 0.1 M in CH<sub>3</sub>CN) was used as the supporting electrolyte. The redox potentials were recorded at a scan rate of 100 mV/s and are reported with reference to the ferrocene/ferrocenium (Fc/Fc<sup>+</sup>) redox couple. The energy levels were calculated using the following equations:  $E_{\text{HOMO}} = -(E_{\text{ox}}^{1/2} - E_{\text{Fc}/\text{Fc}^+} + 4.8)$  eV,<sup>4</sup>  $E_{\text{LUMO}} = E_{\text{HOMO}} + E_{\text{g}}^{\text{opt}}$ , optical energy gap  $E_{\text{g}}^{\text{opt}}$  was estimated from the absorption onset using the equation ( $E_{\text{g}}^{\text{opt}} = 1240/\lambda_{\text{edge}}$ ).<sup>5</sup>

**Theoretical Calculations.** To further interpret the UV-Vis spectral behavior of binuclear Pt(II) complexes (***R,S,R***)/(***S,R,S***)-Pt1/Pt2, the initial computational models of (***R,S,R***)/(***S,R,S***)-Pt1/Pt2 were built according to their crystal structure. Their minimum energy structures based on the ground-state (S<sub>0</sub>) were obtained from density functional theory (DFT) calculations which were carried out employing the popular B3LYP functional theory using ORCA software at the def2-TZVP<sup>6</sup> basis set with def2/J<sup>7</sup> and def2/JK<sup>8</sup> as auxiliary basis set. After that, their time-dependent DFT (TD-DFT) calculations were performed to explore energy transitions. The optimized structure of the ground-state (S<sub>0</sub>) was used to calculate the UV-Vis absorption, PL, CD and CPL spectra by TD-DFT (dichloromethane as the solvent, pcm method, 100 singlet-singlet transitions and 100 singlet-triplet transitions). The luminescence dissymmetry factor  $g_{\text{abs}}/g_{\text{lum}}$  of a given transition (e.g., S<sub>n</sub> (n = 1~4)/T<sub>1</sub> to S<sub>0</sub> (S<sub>n</sub> (n = 1~4)/T<sub>1</sub> → S<sub>0</sub>)) is given by the equation  $g_{\text{abs}}/g_{\text{lum}} = 4R/(D + G)$ ,<sup>9</sup> where  $R = |\mu_{\text{e}}||\mu_{\text{m}}|\cos\theta$  is the transition rotatory strength,  $D = |\mu_{\text{e}}|^2$  is the transition electric dipole strength,  $G = |\mu_{\text{m}}|^2$  is the transition magnetic electric dipole strength,  $\mu_{\text{e}}$  and  $\mu_{\text{m}}$  are the electric and magnetic transition dipole moments, respectively, and  $\theta$  the angle between the two. To compute  $g_{\text{abs}}/g_{\text{lum}}$ , the rotatory and dipole strength for the S<sub>0</sub>→S<sub>n</sub> (n = 1~4)/T<sub>1</sub>→S<sub>0</sub> transition from the S<sub>n</sub> (n = 1~4)/T<sub>1</sub> state of binuclear Pt(II) complexes were

extracted from the ORCA output. The dipole strength is the square of the electric dipole moment as the length gauge, in au ( $1 \text{ au} = 2.541746 \text{ D} = 10^{-18} \text{ esu cm}$ ). From there, the  $g_{\text{abs}}$  and  $g_{\text{lum}}$  value can be computed at the wavelength of the transition.

### Synthesis and Characterizations

**Synthesis of HC<sup>N</sup> ligand 1-(4-fluorophenyl)isoquinoline (F-Hpiq).** The ligand **F-Hpiq** was synthesized from the improved Suzuki coupling reaction<sup>10</sup> of 1-chloroisoquinoline with 4-fluorophenylboronic acid. Tetrakis(triphenylphosphine)palladium (0) ( $\text{Pd}(\text{PPh}_3)_4$ , 0.347 g, 0.3 mmol) was added to a mixture of 1-chloroisoquinoline (1.080 g, 6.6 mmol), 4-fluorophenylboronic acid (0.840 g, 6 mmol), toluene (21 mL), ethanol (3 mL) and an aqueous potassium carbonate solution (2 M, 0.842 g in 6 mL water) under vigorous stirring. The mixture was stirred at 80 °C for 48 h under a nitrogen atmosphere. After cooling to room temperature, the reaction mixture was poured into water and extracted with ethyl acetate. The organic layer was washed with brine several times, and the solvent was then evaporated. Addition of  $\text{CH}_2\text{Cl}_2$  followed by pentane precipitated a white solid which was filtered off. The residue was purified by column chromatography ( $\text{SiO}_2$ , *n*-Hexane/AcOEt, V/V = 8:1;  $R_f = 0.5$ ) and isolated as a white solid. Yield: 1.044 g (78%). Anal calcd for  $\text{C}_{15}\text{H}_{10}\text{FN}$ : C, 80.70; H, 4.52; N, 6.27%. Found: C, 80.72; H, 4.48; N, 6.29%.  $^1\text{H}$  NMR (600 MHz,  $\text{CDCl}_3$ ,  $\delta$ ) 8.60 (d,  $J = 5.7 \text{ Hz}$ , 1H), 8.07 (d,  $J = 8.5 \text{ Hz}$ , 1H), 7.89 (d,  $J = 8.2 \text{ Hz}$ , 1H), 7.75-7.63 (m, 4H), 7.56 (t,  $J = 7.7 \text{ Hz}$ , 1H), 7.31-7.18 (m, 2H).  $^{13}\text{C}\{^1\text{H}\}$  NMR (151 MHz,  $\text{CDCl}_3$ ,  $\delta$ ) 163.24 (d,  $^1J_{\text{C-F}} = 248.11 \text{ Hz}$ ), 159.77, 142.32, 137.04, 135.76 (d,  $^4J_{\text{C-F}} = 3.29 \text{ Hz}$ ), 131.86 (d,  $^3J_{\text{C-F}} = 8.24 \text{ Hz}$ ), 130.25, 130.25, 127.49, 127.32 (d,  $^2J_{\text{C-F}} = 28.86 \text{ Hz}$ ), 126.80, 120.21, 115.59, 115.45, 115.43.  $^{19}\text{F}\{^1\text{H}\}$  NMR (376.4 MHz,  $\text{CDCl}_3$ ,  $\delta$ ) -113.15 (s). HRMS (ESI) ( $m/z$ ): calcd for  $\text{C}_{15}\text{H}_{10}\text{FN} + \text{H}^+$ , 224.0870; found, 224.0595.

**Synthesis of HC<sup>N</sup> ligand 1-(benzo[*b*]thiophen-2-yl)isoquinoline-4-carbonitrile (CN-Hiqbt).** The ligand **CN-Hiqbt** was obtained following a procedure analogous to that used for **F-Hpiq**. A mixture of 1-chloroisoquinoline-4-carbonitrile (0.623 g, 3.3 mmol), 1-benzothiophen-2-ylboronic acid (0.535 g, 3.0 mmol) was dissolved into absolute mixed solvents of toluene and EtOH (30 mL; V/V = 2:1) under an  $\text{N}_2$  atmosphere. Then an aqueous solution (5 mL) of  $\text{K}_2\text{CO}_3$

(2 M) was added, and the mixture was degassed by an N<sub>2</sub> flow. Anhydrous Pd(PPh<sub>3</sub>)<sub>4</sub> (174 mg, 0.15 mmol) was added to the reaction mixture and then heated at 80 °C for 48 h. The complete consumption of reagents was monitored by thin-layer chromatography (*n*-Hexane/AcOEt, V:V = 5:1; *R<sub>f</sub>* = 0.40). After cooling to room temperature, the organic phase was washed with brine and extracted with absolute CH<sub>2</sub>Cl<sub>2</sub> (3×20 mL) three times. The combined organic phase was dried over anhydride Na<sub>2</sub>SO<sub>4</sub>, and further purified with flash-column chromatography on silica gel (*n*-Hexane/AcOEt, V/V = 5:1), affording to an off-white solid. Yield: 0.645 g (75%). Anal calcd for C<sub>18</sub>H<sub>10</sub>N<sub>2</sub>S: C, 75.50; H, 3.52; N, 9.78%. Found: C, 75.53; H, 3.49; N, 9.74%. <sup>1</sup>H NMR (600 MHz, CDCl<sub>3</sub>, δ) 8.94 (s, 1H), 8.75 (d, *J* = 8.5 Hz, 1H), 8.31 – 8.26 (m, 1H), 7.98 – 7.94 (m, 3H), 7.93 – 7.91 (m, 1H), 7.83 (ddd, *J* = 8.3, 6.8, 1.2 Hz, 1H), 7.50 – 7.40 (m, 2H). <sup>13</sup>C {<sup>1</sup>H} NMR (151 MHz, CDCl<sub>3</sub>, δ) 157.55, 147.44, 141.66, 141.45, 140.03, 136.05, 132.85, 129.78, 127.90, 127.78, 126.27, 125.47, 125.06, 124.95, 122.59, 116.44, 104.81. HRMS (ESI) (*m/z*): calcd for C<sub>18</sub>H<sub>10</sub>N<sub>2</sub>S+H<sup>+</sup>, 287.0637; found, 286.9925.

**Synthesis of the Pt(II) intermediates [Pt(F-piq)(F-Hpiq)Cl] and [Pt(CN-iqbt)(CN-Hiqbt)Cl].** K<sub>2</sub>PtCl<sub>4</sub> (0.415 g, 1 mmol) and **F-Hpiq** (0.446 g, 2 mmol) in a 3:1 (V/V) mixture of 2-ethoxyethanol (18 mL) and H<sub>2</sub>O (6 mL) were heated at 80 °C for 16 h under nitrogen atmosphere. After cooling to room temperature, saturated brine (30 mL) was added to the mixture. The precipitated yellow-green solid was collected by filtration and washed successively with isopropanol, diethyl ether, and hexane. The product was then dried under vacuum at 45 °C. The crude Pt(II) intermediate was directly used in the subsequent step without further purification. The Pt(II) intermediate **[Pt(CN-iqbt)(CN-Hiqbt)Cl]** was obtained by similar procedure.

**Synthesis of the chiral binuclear Pt(II) complexes (*R,S,R*)/(*S,R,S*)-Pt1/Pt2.** A mixture of the Pt(II) intermediate **[Pt(F-piq)(F-Hpiq)Cl]** or **[Pt(CN-iqbt)(CN-Hiqbt)Cl]**, (*R*)/(*S*)-4-phenyl-1,3-thiazolidine-2-thione (***R/S*-Hptt**), and K<sub>2</sub>CO<sub>3</sub> (3 equiv.) in a sealed tube with dichloroethane was stirred at 80 °C for 24 h under an argon atmosphere. Then the solvent was removed under reduced pressure, and the residue of (*R,S,R*)/(*S,R,S*)-Pt1/Pt2 was purified through column chromatography using petroleum ether and dichloromethane as the eluent to give the products

as powders.

**(R,S,R)-Pt1.** Deep-red solid (Yield: 32%):  $^1\text{H}$  NMR (600 MHz,  $\text{CDCl}_3$ ,  $\delta$ ) 8.13 (d,  $J = 8.6$  Hz, 2H), 8.03 (d,  $J = 6.4$  Hz, 2H), 7.70 (d,  $J = 8.2$  Hz, 2H), 7.64 (d,  $J = 7.7$  Hz, 4H), 7.60 (t,  $J = 7.4$  Hz, 2H), 7.45 (t,  $J = 7.8$  Hz, 2H), 7.23 (d,  $J = 6.4$  Hz, 2H), 7.19 (dd,  $J = 8.7, 5.7$  Hz, 2H), 7.09 (t,  $J = 7.5$  Hz, 4H), 7.03 (t,  $J = 7.3$  Hz, 2H), 6.86 (dd,  $J = 10.4, 2.7$  Hz, 2H), 5.90 (t,  $J = 8.4$  Hz, 2H), 5.79 (td,  $J = 8.5, 2.8$  Hz, 2H), 3.95 (dd,  $J = 11.4, 8.4$  Hz, 2H), 3.72 (dd,  $J = 11.4, 8.4$  Hz, 2H).  $^{13}\text{C}\{^1\text{H}\}$  NMR (151 MHz,  $\text{CDCl}_3$ ,  $\delta$ ) 179.30, 165.20, 161.15 (d,  $^1J_{\text{C-F}} = 254.10$  Hz), 146.64 (d,  $^4J_{\text{C-F}} = 6.63$  Hz), 141.35, 140.26, 137.30, 130.69, 129.19 (d,  $^3J_{\text{C-F}} = 8.79$  Hz), 128.55, 128.53, 128.25, 127.27 (d,  $^3J_{\text{C-F}} = 10.13$  Hz), 126.58, 124.55, 119.87 (d,  $^2J_{\text{C-F}} = 18.66$  Hz), 119.07, 107.91 (d,  $^2J_{\text{C-F}} = 22.92$  Hz), 80.15, 41.90.  $^{19}\text{F}\{^1\text{H}\}$  NMR (376.4 MHz,  $\text{CDCl}_3$ ,  $\delta$ ) -110.87 (s), -110.87 (d,  $^4J_{195\text{Pt}-19\text{F}} = 45.17$  Hz). HRMS (ESI) ( $m/z$ ): calcd for  $\text{C}_{48}\text{H}_{34}\text{F}_2\text{N}_4\text{Pt}_2\text{S}_4 + \text{H}^+$ , 1223.0995; found, 1223.0996. Anal. calcd for  $\text{C}_{48}\text{H}_{34}\text{F}_2\text{N}_4\text{Pt}_2\text{S}_4$ : C, 47.13; H, 2.80; N, 4.58; found: C, 47.21; H, 2.81; N, 4.60.

**(S,R,S)-Pt1.** Deep-red solid (Yield: 35%):  $^1\text{H}$  NMR (600 MHz,  $\text{CDCl}_3$ ,  $\delta$ ) 8.13 (d,  $J = 8.6$  Hz, 2H), 8.03 (d,  $J = 6.3$  Hz, 2H), 7.70 (d,  $J = 8.2$  Hz, 2H), 7.67 – 7.63 (m, 4H), 7.60 (t,  $J = 7.4$  Hz, 2H), 7.48 – 7.42 (m, 2H), 7.23 (d,  $J = 6.4$  Hz, 2H), 7.19 (dd,  $J = 8.6, 5.7$  Hz, 2H), 7.09 (t,  $J = 7.5$  Hz, 4H), 7.03 (t,  $J = 7.3$  Hz, 2H), 6.86 (dd,  $J = 10.3, 2.7$  Hz, 2H), 5.90 (t,  $J = 8.4$  Hz, 2H), 5.79 (td,  $J = 8.5, 2.8$  Hz, 2H), 3.95 (dd,  $J = 11.4, 8.4$  Hz, 2H), 3.72 (dd,  $J = 11.4, 8.4$  Hz, 2H).  $^{13}\text{C}\{^1\text{H}\}$  NMR (151 MHz,  $\text{CDCl}_3$ ,  $\delta$ ) 179.30, 165.20, 161.15 (d,  $^1J_{\text{C-F}} = 254.10$  Hz), 146.64 (d,  $^4J_{\text{C-F}} = 6.63$  Hz), 141.35, 140.26, 137.30, 130.69, 129.19 (d,  $^3J_{\text{C-F}} = 8.79$  Hz), 128.55, 128.53, 128.25, 127.27 (d,  $^3J_{\text{C-F}} = 10.13$  Hz), 126.58, 124.55, 119.87 (d,  $^2J_{\text{C-F}} = 18.66$  Hz), 119.07, 107.91 (d,  $^2J_{\text{C-F}} = 22.92$  Hz), 80.15, 41.90.  $^{19}\text{F}\{^1\text{H}\}$  NMR (376.4 MHz,  $\text{CDCl}_3$ ,  $\delta$ ) -110.88 (s), -110.87 (d,  $^4J_{195\text{Pt}-19\text{F}} = 45.17$  Hz). HRMS (ESI) ( $m/z$ ): calcd for  $\text{C}_{48}\text{H}_{34}\text{F}_2\text{N}_4\text{Pt}_2\text{S}_4 + \text{H}^+$ , 1223.0995; found, 1223.0994. Anal. calcd for  $\text{C}_{48}\text{H}_{34}\text{F}_2\text{N}_4\text{Pt}_2\text{S}_4$ : C, 47.13; H, 2.80; N, 4.58; found: C, 47.17; H, 2.84; N, 4.60.

**(R,S,R)-Pt2.** Dark maroon solid (Yield: 28%):  $^1\text{H}$  NMR (600 MHz,  $\text{CDCl}_3$ ,  $\delta$ ) 8.76 (d,  $J = 8.1$  Hz, 2H), 8.44 (d,  $J = 8.3$  Hz, 2H), 7.82 (s, 2H), 7.80 – 7.73 (m, 4H), 7.63 – 7.51 (m, 6H), 7.19 (dd,  $J = 8.6, 6.8$  Hz, 6H), 7.12 – 7.06 (m, 2H), 6.86 – 6.77 (m, 4H), 6.16 (dd,  $J = 9.1, 5.4$  Hz,

2H), 4.23 (dd,  $J = 11.5, 9.1$  Hz, 2H), 3.90 (dd,  $J = 11.5, 5.5$  Hz, 2H).  $^{13}\text{C}\{^1\text{H}\}$  NMR (151 MHz,  $\text{CDCl}_3$ ,  $\delta$ ) 180.20, 165.00, 154.54, 146.92, 143.92, 143.64, 139.95, 137.71, 134.88, 132.82, 129.79, 129.25, 128.87, 128.37, 128.23, 128.12, 127.04, 124.33, 123.83, 122.51, 120.38, 116.11, 100.95, 79.72, 41.49. HRMS (ESI) ( $m/z$ ): calcd for  $\text{C}_{54}\text{H}_{34}\text{N}_6\text{Pt}_2\text{S}_6+\text{H}^+$ , 1350.0539; found, 1350.0536. Anal. calcd for  $\text{C}_{54}\text{H}_{34}\text{N}_6\text{Pt}_2\text{S}_6$ : C, 48.06; H, 2.54; N, 6.23; found: C, 48.04; H, 2.49; N, 6.19.

**(S,R,S)-Pt2.** Dark maroon solid (Yield: 30%):  $^1\text{H}$  NMR (600 MHz,  $\text{CDCl}_3$ ,  $\delta$ ) 8.76 (d,  $J = 8.2$  Hz, 2H), 8.44 (dd,  $J = 8.1, 1.6$  Hz, 2H), 7.82 (s, 2H), 7.80 – 7.74 (m, 4H), 7.58 – 7.53 (m, 6H), 7.22 – 7.14 (m, 6H), 7.13 – 7.06 (m, 2H), 6.87 – 6.78 (m, 4H), 6.16 (dd,  $J = 9.1, 5.4$  Hz, 2H), 4.23 (dd,  $J = 11.5, 9.1$  Hz, 2H), 3.90 (dd,  $J = 11.5, 5.4$  Hz, 2H).  $^{13}\text{C}\{^1\text{H}\}$  NMR (151 MHz,  $\text{CDCl}_3$ ,  $\delta$ ) 180.20, 167.89, 165.00, 154.54, 146.92, 143.92, 143.63, 139.94, 137.71, 134.88, 132.82, 132.45, 131.08, 129.79, 129.25, 129.00, 128.87, 128.38, 128.22, 128.12, 127.04, 124.34, 123.83, 122.50, 120.38, 116.11, 100.95, 79.72, 41.49. HRMS (ESI) ( $m/z$ ): calcd for  $\text{C}_{54}\text{H}_{34}\text{N}_6\text{Pt}_2\text{S}_6+\text{H}^+$ , 1350.0539; found, 1350.0541. Anal. calcd for  $\text{C}_{54}\text{H}_{34}\text{N}_6\text{Pt}_2\text{S}_6$ : C, 48.06; H, 2.54; N, 6.23; found: C, 48.07; H, 2.56; N, 6.17.

**Scheme S1. Chemical structures and synthetic routes of the chiral binuclear Pt(II) complexes.**

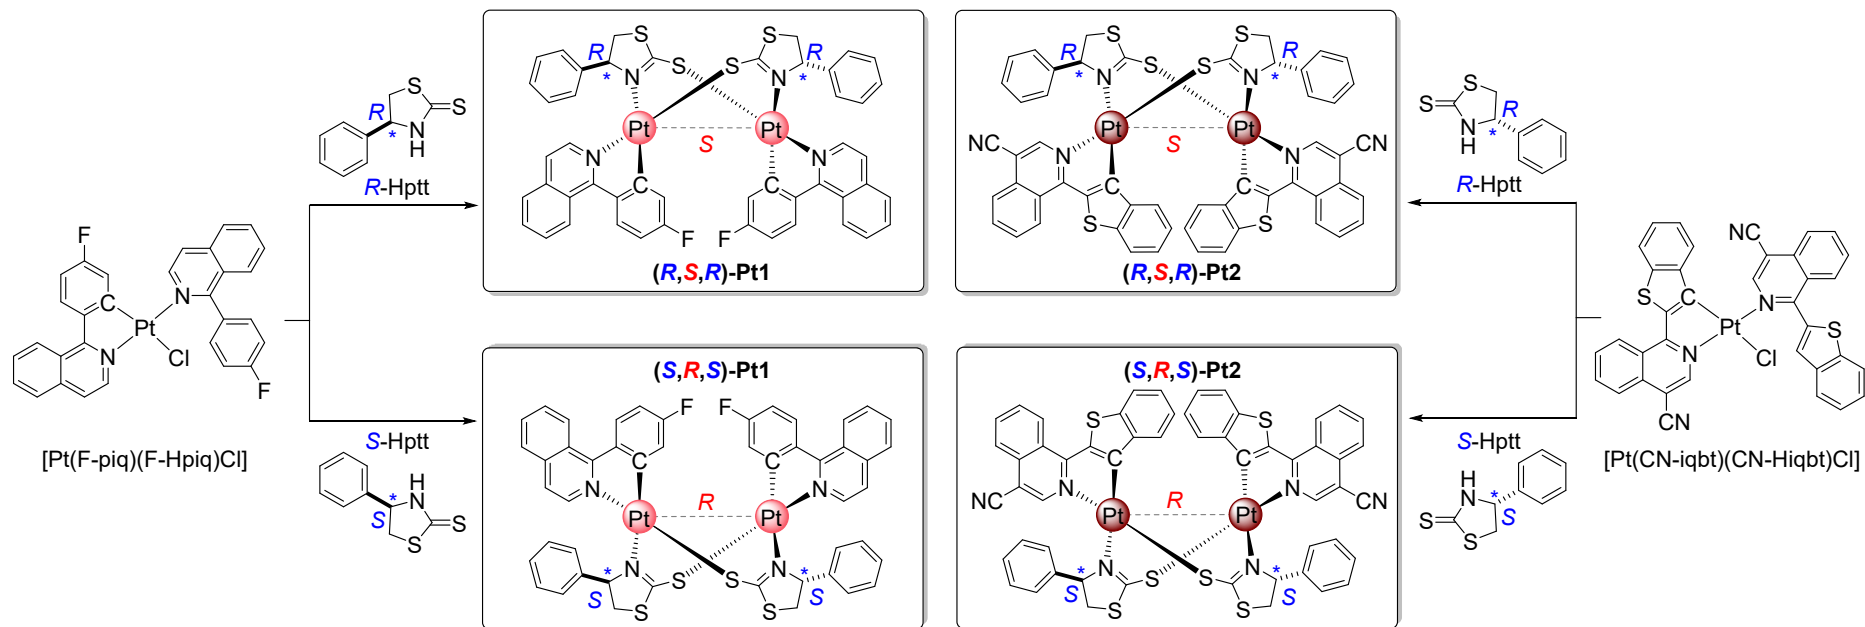

**Table S1.** The selected  $^1\text{H}$  NMR data for the chiral binuclear Pt(II) complexes.

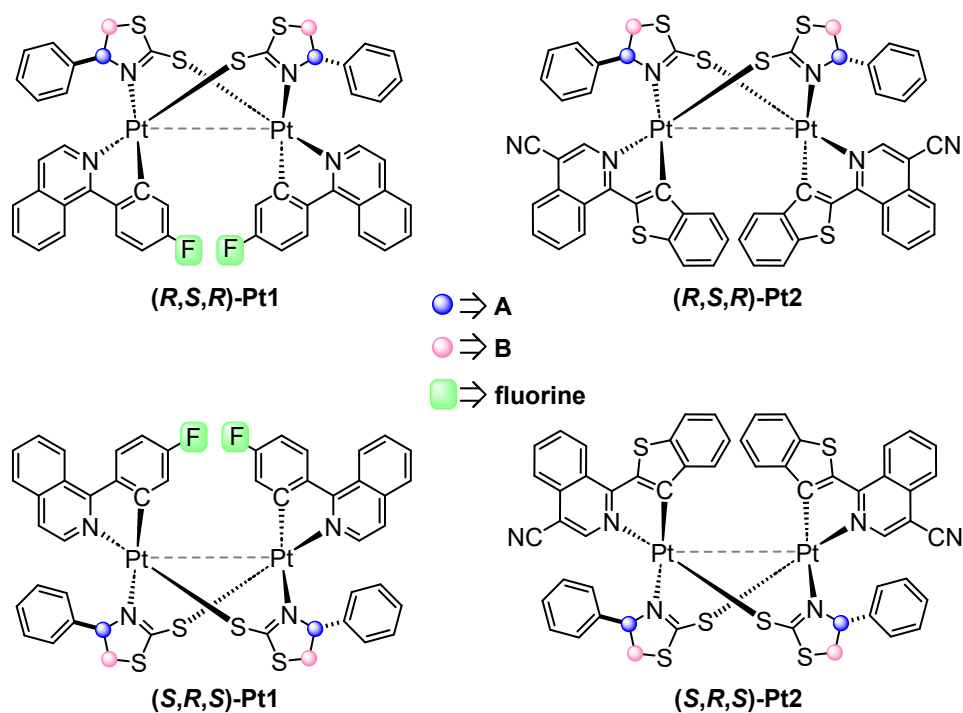

| Complex                   | Chemical shift (ppm)           |                     |                     |                                |                     |                     |                         |
|---------------------------|--------------------------------|---------------------|---------------------|--------------------------------|---------------------|---------------------|-------------------------|
|                           | The combined proton resonances | $\text{H}_\text{A}$ | $\text{H}_\text{B}$ | The combined carbon resonances | $\text{C}_\text{A}$ | $\text{C}_\text{B}$ | The fluorine resonances |
| <b>(<i>R,S,R</i>)-Pt1</b> | 8.13-3.72                      | 5.79                | 3.75, 3.72          | 179.30-41.90                   | 80.15               | 41.90               | -110.87                 |
| <b>(<i>S,R,S</i>)-Pt1</b> | 8.13-3.72                      | 5.79                | 3.75, 3.72          | 179.30-41.90                   | 80.15               | 41.90               | -110.88                 |
| <b>(<i>R,S,R</i>)-Pt2</b> | 8.76-3.90                      | 6.16                | 4.23, 3.90          | 180.20-41.49                   | 79.72               | 41.49               | /                       |
| <b>(<i>S,R,S</i>)-Pt2</b> | 8.76-3.90                      | 6.16                | 4.23, 3.90          | 180.20-41.49                   | 79.72               | 41.49               | /                       |

<sup>a</sup>) All  $^1\text{H}$  NMR,  $^{13}\text{C}\{^1\text{H}\}$  NMR and  $^{19}\text{F}\{^1\text{H}\}$  NMR spectra were recorded in  $\text{CDCl}_3$  at room temperature.

**Table S2. Selected** crystallographic data for the chiral binuclear Pt(II) complexes.

| Complex                                                                     | <i>(R,S,R)</i> -Pt1                                                                          | <i>(S,R,S)</i> -Pt1                                                                          | <i>(R,S,R)</i> -Pt2                                                           | <i>(S,R,S)</i> -Pt2                                                           |
|-----------------------------------------------------------------------------|----------------------------------------------------------------------------------------------|----------------------------------------------------------------------------------------------|-------------------------------------------------------------------------------|-------------------------------------------------------------------------------|
| Chemical formula                                                            | C <sub>48</sub> H <sub>34</sub> F <sub>2</sub> N <sub>4</sub> Pt <sub>2</sub> S <sub>4</sub> | C <sub>48</sub> H <sub>34</sub> F <sub>2</sub> N <sub>4</sub> Pt <sub>2</sub> S <sub>4</sub> | C <sub>54</sub> H <sub>34</sub> N <sub>6</sub> Pt <sub>2</sub> S <sub>6</sub> | C <sub>54</sub> H <sub>34</sub> N <sub>6</sub> Pt <sub>2</sub> S <sub>6</sub> |
| CCDC number                                                                 | 2526096                                                                                      | 2526097                                                                                      | 2526098                                                                       | 2526099                                                                       |
| Crystal size (mm)                                                           | 0.20 × 0.20 × 0.18                                                                           | 0.21 × 0.20 × 0.17                                                                           | 0.20 × 0.18 × 0.20                                                            | 0.20 × 0.20 × 0.18                                                            |
| Temperature/K                                                               | 193                                                                                          | 150                                                                                          | 150                                                                           | 200                                                                           |
| Crystal system                                                              | monoclinic                                                                                   | monoclinic                                                                                   | orthorhombic                                                                  | orthorhombic                                                                  |
| Space group                                                                 | <i>P</i> 2 <sub>1</sub>                                                                      | <i>P</i> 2 <sub>1</sub>                                                                      | <i>P</i> 2 <sub>1</sub> 2 <sub>1</sub> 2 <sub>1</sub>                         | <i>P</i> 2 <sub>1</sub> 2 <sub>1</sub> 2 <sub>1</sub>                         |
| <i>a</i> /Å                                                                 | 11.3739(10)                                                                                  | 11.2864(5)                                                                                   | 12.5446(9)                                                                    | 12.6435(11)                                                                   |
| <i>b</i> /Å                                                                 | 15.5577(12)                                                                                  | 15.3857(6)                                                                                   | 19.2471(15)                                                                   | 19.402(2)                                                                     |
| <i>c</i> /Å                                                                 | 12.1253(11)                                                                                  | 12.0821(6)                                                                                   | 22.0945(18)                                                                   | 22.375(3)                                                                     |
| <i>α</i> /°                                                                 | 90                                                                                           | 90                                                                                           | 90                                                                            | 90                                                                            |
| <i>β</i> /°                                                                 | 98.352(3)                                                                                    | 98.285(2)                                                                                    | 90                                                                            | 90                                                                            |
| <i>γ</i> /°                                                                 | 90                                                                                           | 90                                                                                           | 90                                                                            | 90                                                                            |
| <i>V</i> /Å <sup>3</sup>                                                    | 2122.8(3)                                                                                    | 2076.15(16)                                                                                  | 5334.7(7)                                                                     | 5489.0(10)                                                                    |
| <i>Z</i>                                                                    | 2                                                                                            | 2                                                                                            | 4                                                                             | 4                                                                             |
| $\rho_{\text{calc}}$ (g/cm <sup>3</sup> )                                   | 1.914                                                                                        | 1.957                                                                                        | 1.680                                                                         | 1.838                                                                         |
| $\mu$ /mm <sup>-1</sup>                                                     | 6.829                                                                                        | 6.982                                                                                        | 5.515                                                                         | 5.559                                                                         |
| <i>F</i> (000)                                                              | 1176.0                                                                                       | 1176.0                                                                                       | 2608.0                                                                        | 2944.0                                                                        |
| Reflections collected                                                       | 20000                                                                                        | 96796                                                                                        | 189858                                                                        | 23637                                                                         |
| GOF ( <i>F</i> <sup>2</sup> )                                               | 1.062                                                                                        | 1.017                                                                                        | 0.979                                                                         | 1.005                                                                         |
| <i>R</i> <sub>int</sub>                                                     | 0.0601                                                                                       | 0.0532                                                                                       | 0.0811                                                                        | 0.0359                                                                        |
| <i>R</i> <sub>sigma</sub>                                                   | 0.0686                                                                                       | 0.0304                                                                                       | 0.0314                                                                        | 0.0672                                                                        |
| <i>R</i> <sub>1</sub> / <i>wR</i> <sub>2</sub> [ <i>I</i> ≥ 2σ( <i>I</i> )] | 0.0444/0.1140                                                                                | 0.0146/0.0285                                                                                | 0.0242/0.0626                                                                 | 0.0362/0.0839                                                                 |
| <i>R</i> <sub>1</sub> / <i>wR</i> <sub>2</sub> [all data]                   | 0.0497/0.1188                                                                                | 0.0159/0.0288                                                                                | 0.0255/0.0632                                                                 | 0.0449/0.0877                                                                 |
| Flack parameter                                                             | 0.074(17)                                                                                    | 0.008(2)                                                                                     | 0.067(5)                                                                      | 0.090(9)                                                                      |

**Table S3.** The selected bond lengths (Å) and bond angles (°) for the chiral binuclear Pt(II) complexes.

| Complex             | ( <i>R,S,R</i> )-Pt1 | ( <i>S,R,S</i> )-Pt1 | Complex             | ( <i>R,S,R</i> )-Pt2 | ( <i>S,R,S</i> )-Pt2 |
|---------------------|----------------------|----------------------|---------------------|----------------------|----------------------|
| Selected bond       | Bond length (Å)      |                      | Selected bond       | Bond length (Å)      |                      |
| Pt(1)-N(1)          | 2.158(14)            | 2.151(3)             | Pt(1)-N(1)          | 2.123(4)             | 2.134(7)             |
| Pt(1)-N(3)          | 2.050(15)            | 2.037(3)             | Pt(1)-N(3)          | 2.072(5)             | 2.086(7)             |
| Pt(1)-S(2)          | 2.299(5)             | 2.291(10)            | Pt(1)-S(2)          | 2.295(14)            | 2.303(2)             |
| Pt(1)-C(29)         | 2.021(8)             | 1.982(4)             | Pt(1)-C(29)         | 1.993(5)             | 2.008(8)             |
| Pt(2)-N(2)          | 2.105(13)            | 2.140(3)             | Pt(2)-N(2)          | 2.127(5)             | 2.168(8)             |
| Pt(2)-N(4)          | 2.053(11)            | 2.049(3)             | Pt(2)-N(4)          | 2.066(5)             | 2.055(8)             |
| Pt(2)-S(1)          | 2.286(4)             | 2.2821(8)            | Pt(2)-S(1)          | 2.290(15)            | 2.290(3)             |
| Pt(2)-C(44)         | 2.013(7)             | 1.980(3)             | Pt(2)-C(47)         | 1.991(6)             | 2.015(9)             |
| Selected bond angle | Bond angles (°)      |                      | Selected bond angle | Bond angles (°)      |                      |
| C(29)-Pt(1)-N(1)    | 176.7(5)             | 176.69(15)           | C(29)-Pt(1)-N(1)    | 174.7(2)             | 174.9(4)             |
| C(29)-Pt(1)-N(3)    | 79.7(5)              | 80.17(15)            | C(29)-Pt(1)-N(3)    | 79.9(2)              | 79.9(3)              |
| N(1)-Pt(1)-S(2)     | 87.1(4)              | 87.97(9)             | N(1)-Pt(1)-S(2)     | 85.65(15)            | 85.5(2)              |
| N(3)-Pt(1)-S(2)     | 175.2(4)             | 174.88(9)            | N(3)-Pt(1)-S(2)     | 79.18(16)            | 179.4(2)             |
| C(44)-Pt(2)-N(2)    | 176.8(5)             | 177.85(13)           | C(47)-Pt(2)-N(2)    | 175.9(2)             | 175.1(3)             |
| C(44)-Pt(2)-N(4)    | 79.8(5)              | 80.27(12)            | C(47)-Pt(2)-N(4)    | 80.1(2)              | 79.8(3)              |
| N(2)-Pt(2)-S(1)     | 86.9(4)              | 86.75(8)             | N(2)-Pt(2)-S(1)     | 86.18(13)            | 86.6(2)              |
| N(4)-Pt(2)-S(1)     | 174.9(4)             | 174.76(8)            | N(4)-Pt(2)-S(1)     | 177.65(16)           | 178.0(2)             |

**Table S4.** Intramolecular Pt-Pt distances, intermolecular noncovalent interactions and intermolecular  $\pi$ - $\pi$  interactions between molecules for the chiral binuclear Pt(II) complexes.

| Complex            | Intramolecular Pt-Pt distances (Å) | Intermolecular noncovalent interactions (Å) | Intermolecular $\pi$ - $\pi$ interactions between molecules (Å) |
|--------------------|------------------------------------|---------------------------------------------|-----------------------------------------------------------------|
| <b>(R,S,R)-Pt1</b> | 2.922                              | S···H 2.970, 2.931                          | 3.395                                                           |
|                    |                                    | F···H 2.617, 2.647, 2.609                   |                                                                 |
| <b>(S,R,S)-Pt1</b> | 2.910                              | S···H 3.343, 2.872                          | 3.370                                                           |
|                    |                                    | F···H 2.603, 2.527, 2.617                   |                                                                 |
| <b>(R,S,R)-Pt2</b> | 2.941                              | S···H 2.818, 2.999                          | 3.422                                                           |
|                    |                                    | F···H 2.396                                 |                                                                 |
| <b>(S,R,S)-Pt2</b> | 2.948                              | S···H 2.919                                 | 3.417                                                           |
|                    |                                    | F···H 2.518                                 |                                                                 |

**Table S5.** Photophysical properties of the chiral binuclear Pt(II) complexes at room temperature.

| Complex            | Medium                          | Absorption                                                                                                                       |                                          | Emission                               |                          |                                              |                                                                    |                                       |
|--------------------|---------------------------------|----------------------------------------------------------------------------------------------------------------------------------|------------------------------------------|----------------------------------------|--------------------------|----------------------------------------------|--------------------------------------------------------------------|---------------------------------------|
|                    |                                 | $\lambda_{\text{abs}}$ ( $\epsilon \times 10^3 \text{ M}^{-1} \text{ cm}^{-1}$ ) [ $\lambda_{\text{edge}}^{\text{onset}}$ ] (nm) | $\lambda_{\text{PL}}^{\text{a}}$<br>(nm) | $\tau^{\text{a}}$<br>( $\mu\text{s}$ ) | PLQY <sup>a</sup><br>(%) | $g_{\text{lum}}^{\text{b}}$<br>( $10^{-3}$ ) | $B_{\text{CPL}}^{\text{c}}$<br>( $\text{M}^{-1} \text{ cm}^{-1}$ ) | $E_{\text{g}}^{\text{opt d}}$<br>(eV) |
| <b>(R,S,R)-Pt1</b> | CH <sub>2</sub> Cl <sub>2</sub> | 228 (60.4), 272 (40.1), 350 (11.5), 383 (8.5), 416 (4.8), 523 (2.7), 546 (2.6) [629] <sup>e</sup>                                | 733 <sup>e</sup>                         | 0.35 <sup>e</sup>                      | 20.6 <sup>e</sup>        | -2.5 <sup>f</sup>                            | 0.7 <sup>f</sup>                                                   | 1.97                                  |
|                    | Doped film                      | -                                                                                                                                | 709 <sup>g</sup>                         | 1.83 <sup>g</sup>                      | 35.4 <sup>g</sup>        | -2.8 <sup>h</sup>                            | -                                                                  | -                                     |
| <b>(S,R,S)-Pt1</b> | CH <sub>2</sub> Cl <sub>2</sub> | 225 (56.8), 272 (36.7), 350 (10.5), 382 (7.8), 416 (4.4), 521 (2.4), 546 (2.4) [629] <sup>e</sup>                                | 731 <sup>e</sup>                         | 0.40 <sup>e</sup>                      | 21.0 <sup>e</sup>        | +2.5 <sup>f</sup>                            | 0.6 <sup>f</sup>                                                   | 1.97                                  |
|                    | Doped film                      | -                                                                                                                                | 708 <sup>g</sup>                         | 1.84 <sup>g</sup>                      | 34.2 <sup>g</sup>        | +2.7 <sup>h</sup>                            | -                                                                  | -                                     |
| <b>(R,S,R)-Pt2</b> | CH <sub>2</sub> Cl <sub>2</sub> | 236 (54.3), 319 (22.6), 412 (12.1), 472 (11.2), 542 (8.9), 616 (4.3) [774] <sup>e</sup>                                          | 780,<br>835(sh) <sup>e</sup>             | 0.35 <sup>e</sup>                      | 18.9 <sup>e</sup>        | -2.1 <sup>f</sup>                            | 0.9 <sup>f</sup>                                                   | 1.60                                  |
|                    | Doped film                      | -                                                                                                                                | 792 <sup>g</sup>                         | 1.25 <sup>g</sup>                      | 29.2 <sup>g</sup>        | -3.9 <sup>h</sup>                            | -                                                                  | -                                     |
| <b>(S,R,S)-Pt2</b> | CH <sub>2</sub> Cl <sub>2</sub> | 236 (56.8), 330 (22.5), 412 (12.6), 473 (11.8), 541 (9.2), 613 (4.4) [774] <sup>e</sup>                                          | 775,<br>837(sh) <sup>e</sup>             | 0.32 <sup>e</sup>                      | 17.8 <sup>e</sup>        | +2.1 <sup>f</sup>                            | 0.8 <sup>f</sup>                                                   | 1.60                                  |
|                    | Doped film                      | -                                                                                                                                | 794 <sup>g</sup>                         | 1.29 <sup>g</sup>                      | 28.5 <sup>g</sup>        | +3.8 <sup>h</sup>                            | -                                                                  | -                                     |

<sup>a</sup>Excitation wavelength 375 nm; <sup>b</sup>at Wavelength of the PL maximum ( $\lambda_{\text{PL}}^{\text{Max}}$ ), <sup>c</sup>CPL brightness ( $B_{\text{CPL}}$ ) were defined as the following equation  $B_{\text{CPL}} = \epsilon_{\lambda} \times \text{PLQY} \times |g_{\text{lum}}|/2$ , <sup>d</sup> $E_{\text{g}}^{\text{opt}} = 1240/\lambda_{\text{edge}}^{\text{onset}}$ ; <sup>e</sup>At  $1.0 \times 10^{-5}$  mol/L in degassed CH<sub>2</sub>Cl<sub>2</sub>; <sup>f</sup>At  $0.5 \times 10^{-5}$  mol/L in degassed CH<sub>2</sub>Cl<sub>2</sub>; <sup>g</sup>The complex was doped in poly(methyl methacrylate (PMMA) film (5 wt%); <sup>h</sup>The complex was doped in poly(methyl methacrylate (PMMA) film (2 wt%).

**Table S6.** Excitation wavelengths (nm), oscillator strengths ( $f$ ) and the corresponding transition and properties for the chiral binuclear Pt(II) complexes.

| Complex            | State                          | $\lambda$<br>(nm) | $E$<br>(eV) | Oscillator<br>( $f$ ) | Orbital contribution<br>( $>5\%$ ) |
|--------------------|--------------------------------|-------------------|-------------|-----------------------|------------------------------------|
| <b>(R,S,R)-Pt1</b> | S <sub>0</sub> →T <sub>1</sub> | 1056              | 1.17        | 0.0082                | HOMO→LUMO (93.9%)                  |
|                    | S <sub>0</sub> →S <sub>1</sub> | 895               | 1.39        | 0.0241                | HOMO→LUMO (99.3%)                  |
| <b>(S,R,S)-Pt1</b> | S <sub>0</sub> →T <sub>1</sub> | 1056              | 1.17        | 0.0083                | HOMO→LUMO (94.0%)                  |
|                    | S <sub>0</sub> →S <sub>1</sub> | 895               | 1.39        | 0.0242                | HOMO→LUMO (99.3%)                  |
| <b>(R,S,R)-Pt2</b> | S <sub>0</sub> →T <sub>1</sub> | 1226              | 1.01        | 0.0002                | HOMO→LUMO (94.3%)                  |
|                    | S <sub>0</sub> →S <sub>1</sub> | 986               | 1.26        | 0.0298                | HOMO → LUMO (99.3%)                |
| <b>(S,R,S)-Pt2</b> | S <sub>0</sub> →T <sub>1</sub> | 1216              | 1.02        | 0.0001                | HOMO → LUMO (94.2%)                |
|                    | S <sub>0</sub> →S <sub>1</sub> | 978               | 1.27        | 0.0301                | HOMO → LUMO (99.3%)                |

**Table S7.** Frontier orbitals and their corresponding electron cloud density distributions for the chiral binuclear Pt(II) complexes.

| Complex            | Orbital | Contribution of metal $d_{\pi}$ orbitals and $\pi$ orbitals of ligand to MOs (%) |         |         |
|--------------------|---------|----------------------------------------------------------------------------------|---------|---------|
|                    |         | Pt                                                                               | F-piq   | R/S-ptt |
| <b>(R,S,R)-Pt1</b> | LUMO    | 6.18                                                                             | 92.00   | 1.82    |
|                    | HOMO    | 78.97                                                                            | 11.70   | 9.33    |
| <b>(S,R,S)-Pt1</b> | LUMO    | 6.00                                                                             | 92.25   | 1.75    |
|                    | HOMO    | 79.10                                                                            | 11.39   | 9.51    |
| -----              |         |                                                                                  |         |         |
|                    | Orbital | Pt                                                                               | CN-iqbt | R/S-ptt |
| <b>(R,S,R)-Pt2</b> | LUMO    | 7.27                                                                             | 90.77   | 1.96    |
|                    | HOMO    | 73.77                                                                            | 17.05   | 9.18    |
| <b>(S,R,S)-Pt2</b> | LUMO    | 7.02                                                                             | 91.17   | 1.82    |
|                    | HOMO    | 75.69                                                                            | 14.99   | 9.32    |

**Table S8.** Voltammetric data for the chiral binuclear Pt(II) complexes.

| Complex            | $E_{\text{ox}}^{1/2}$ (V) <sup>a</sup> | $E_{\text{HOMO}}$ (eV) <sup>b</sup> | $\lambda_{\text{edge}}^{\text{onset}}$ (nm) | $E_{\text{g}}^{\text{opt}}$ (eV) <sup>c</sup> | $E_{\text{LUMO}}$ (eV) <sup>d</sup> |
|--------------------|----------------------------------------|-------------------------------------|---------------------------------------------|-----------------------------------------------|-------------------------------------|
| <b>(R,S,R)-Pt1</b> | 0.61                                   | -4.90                               | 629                                         | 1.97                                          | -2.93                               |
| <b>(S,R,S)-Pt1</b> | 0.60                                   | -4.89                               | 629                                         | 1.97                                          | -2.92                               |
| <b>(R,S,R)-Pt2</b> | 0.89                                   | -5.18                               | 774                                         | 1.60                                          | -3.58                               |
| <b>(S,R,S)-Pt2</b> | 0.88                                   | -5.17                               | 774                                         | 1.60                                          | -3.57                               |

<sup>a</sup>Reversible. The values were derived from the anodic peak potential. <sup>b</sup>HOMO levels are calculated from the equation ( $E_{\text{HOMO}} = -(E_{\text{ox}}^{1/2} - E_{\text{Fc}/\text{Fc}^+} + 4.8)$  eV; where  $E_{\text{ox}}^{1/2}$  is measured in  $\text{CH}_2\text{Cl}_2$  and reported *versus* the Ag/AgCl). <sup>c</sup>Optical energy gap  $E_{\text{g}}^{\text{opt}}$  was estimated from the absorption onset using the equation ( $E_{\text{g}}^{\text{opt}} = 1240/\lambda_{\text{edge}}^{\text{onset}}$ ). <sup>d</sup>The LUMO energy levels of each complex were calculated according to the following equation ( $E_{\text{LUMO}} = E_{\text{HOMO}} + E_{\text{g}}^{\text{opt}}$ ). Note:  $E_{\text{Fc}/\text{Fc}^+} = 0.51$  V.

**Table S9.** Calculated transition dipole moments and chiroptical properties for the chiral binuclear Pt(II) complexes based on optimized S<sub>0</sub> geometries.

| Complex            | State          | $E$ (eV) | $ \mu_e ^a$ ( $\times 10^{-20}$ esu·cm) | $ \mu_m ^b$ ( $\times 10^{-18}$ erg·G <sup>-1</sup> ) | $\theta_{e,m}^c$ (°) | $g_{\text{abs}}^d$ ( $\times 10^{-2}$ ) |
|--------------------|----------------|----------|-----------------------------------------|-------------------------------------------------------|----------------------|-----------------------------------------|
| <b>(R,S,R)-Pt1</b> | S <sub>1</sub> | 1.39     | 21.5                                    | 8.7                                                   | 14.9                 | -0.3                                    |
|                    | S <sub>2</sub> | 1.73     | 11.3                                    | 6.5                                                   | 137.2                | 0.3                                     |
|                    | S <sub>3</sub> | 2.40     | 36.9                                    | 25.6                                                  | 109.1                | 1.8                                     |
|                    | S <sub>4</sub> | 2.43     | 34.2                                    | 22.3                                                  | 150.1                | 4.5                                     |
| <b>(S,R,S)-Pt1</b> | S <sub>1</sub> | 1.39     | 84.6                                    | 9.4                                                   | 163.1                | 0.3                                     |
|                    | S <sub>2</sub> | 1.74     | 45.1                                    | 7.3                                                   | 43.4                 | -0.3                                    |
|                    | S <sub>3</sub> | 2.39     | 12.6                                    | 25.5                                                  | 71.7                 | -1.8                                    |
|                    | S <sub>4</sub> | 2.43     | 14.3                                    | 22.8                                                  | 22.9                 | -4.2                                    |
| <b>(R,S,R)-Pt2</b> | S <sub>1</sub> | 1.26     | 97.4                                    | 9.8                                                   | 9.9                  | -0.3                                    |
|                    | S <sub>2</sub> | 1.59     | 49.7                                    | 1.8                                                   | 21.6                 | -0.1                                    |
|                    | S <sub>3</sub> | 1.89     | 25.4                                    | 43.1                                                  | 177.1                | 4.9                                     |
|                    | S <sub>4</sub> | 2.10     | 51.1                                    | 45.7                                                  | 68.6                 | -0.9                                    |
| <b>(S,R,S)-Pt2</b> | S <sub>1</sub> | 1.27     | 97.6                                    | 9.5                                                   | 170.1                | 0.3                                     |
|                    | S <sub>2</sub> | 1.59     | 50.1                                    | 1.4                                                   | 170.6                | 0.1                                     |
|                    | S <sub>3</sub> | 1.89     | 23.8                                    | 43.2                                                  | 1.4                  | -5.3                                    |
|                    | S <sub>4</sub> | 2.10     | 51.3                                    | 45.4                                                  | 111.9                | 0.9                                     |

<sup>a</sup>Transition electric dipole moment (TEDM). <sup>b</sup>Transition magnetic dipole moment (TMDM). <sup>c</sup> $\theta_{e,m}$  represents the angle of TEDM and TMDM. <sup>d</sup>Absorption asymmetry  $g$ -factors ( $g_{\text{abs}}$ ) is calculated as follows:  $g_{\text{abs}} = 4R/(D + G)$ , where  $R$ ,  $D$ , and  $G$  represent the rotatory, electric dipole, and magnetic dipole strength, respectively ( $R = |\mu_e||\mu_m|\cos\theta$ ,  $D = |\mu_e|^2$ ,  $G = |\mu_m|^2$ ).

**Table S10.** Calculated transition dipole moments and chiroptical properties for the chiral binuclear Pt(II) complexes based on optimized T<sub>1</sub> geometries.

| Complex            | State          | <i>E</i> (eV) | $ \mu_e ^a$ ( $\times 10^{-20}$<br>esu·cm) | $ \mu_m ^b$ ( $\times 10^{-22}$<br>erg·G <sup>-1</sup> ) | $\theta_{e,m}^c$ (°) | $g_{lum}^d$ ( $\times 10^{-3}$ ) |
|--------------------|----------------|---------------|--------------------------------------------|----------------------------------------------------------|----------------------|----------------------------------|
| <b>(R,S,R)-Pt1</b> | T <sub>1</sub> | 1.24          | 3.9                                        | 0.6                                                      | 45.4                 | 3.3                              |
| <b>(S,R,S)-Pt1</b> |                | 1.24          | 3.9                                        | 0.7                                                      | 44.2                 | -3.4                             |
| <b>(R,S,R)-Pt2</b> |                | 1.08          | 2.9                                        | 0.2                                                      | 2.4                  | 1.8                              |
| <b>(S,R,S)-Pt2</b> |                | 1.09          | 3.0                                        | 0.2                                                      | 0.4                  | -1.6                             |

<sup>a</sup>Transition electric dipole moment (TEDM). <sup>b</sup>Transition magnetic dipole moment (TMDM).

<sup>c</sup> $\theta_{e,m}$  represents the angle of TEDM and TMDM. <sup>d</sup>Luminescence asymmetry *g*-factors ( $g_{lum}$ ) is calculated as follows:  $g_{lum} = 4R/(D + G)$ , where *R*, *D*, and *G* represent the rotatory, electric dipole, and magnetic dipole strength, respectively ( $R = |\mu_e||\mu_m|\cos\theta$ ,  $D = |\mu_e|^2$ ,  $G = |\mu_m|^2$ ).

**Table S11.** Comparison of PLQYs of the designed Pt(II) complexes with the reported Ir(III) and Pt(II) complexes showing PL at NIR region.

| Complex                                                                       | $\lambda_{\text{PL}}$ (nm) | PLQY   | Ref.                                                   |
|-------------------------------------------------------------------------------|----------------------------|--------|--------------------------------------------------------|
| <b>The reported near-infrared photoluminescent dinuclear Pt(II) complexes</b> |                            |        |                                                        |
| <b>5</b>                                                                      | 706                        | 0.36   | <i>Angew. Chem. Int. Ed.</i> 2026, <b>65</b> , e19762  |
| <b>7</b>                                                                      | 702                        | 0.64   |                                                        |
| <b>4b</b>                                                                     | 794                        | 0.3    | <i>J Korean Chem Soc</i> , 2025, <b>69</b> , 39        |
| <b>[Pt(tfppy)(<math>\mu</math>-PyXZ)] (2)</b>                                 | 705                        | 0.46   | <i>Adv. Optical Mater.</i> , 2023, <b>11</b> , 2300201 |
| <b>[Pt(piq)(<math>\mu</math>-Czl)] (Pt-4)</b>                                 | 740                        | 0.29   | <i>Mater. Chem. Front.</i> , 2023, <b>7</b> , 873      |
| <b>1</b>                                                                      | 726                        | 0.11   | <i>Adv. Funct. Mater.</i> , 2023, <b>33</b> , 2211853  |
| <b>2</b>                                                                      | 712                        | 0.16   |                                                        |
| <b>3</b>                                                                      | 722                        | 0.18   |                                                        |
| <b>4</b>                                                                      | 701                        | 0.17   |                                                        |
| <b>1</b>                                                                      | 706                        | 0.16   |                                                        |
| <b>2</b>                                                                      | 725                        | 0.095  |                                                        |
| <b>3</b>                                                                      | 736                        | 0.083  |                                                        |
| <b>4</b>                                                                      | 710                        | 0.013  |                                                        |
| <b>5</b>                                                                      | 725                        | 0.104  |                                                        |
| <b>Pt-4</b>                                                                   | 802                        | 0.05   |                                                        |
| <b>Pt-5</b>                                                                   | 758                        | 0.07   | <i>Inorg. Chem.</i> , 2022, <b>61</b> , 5178           |
| <b>Pt<sub>2</sub>(bis-dthpym)(dpm)<sub>2</sub></b>                            | 725                        | 0.17   | <i>J. Mater. Chem. C</i> , 2021, <b>9</b> , 127        |
| <b>(DIQB)[Pt(DPM)]<sub>2</sub></b>                                            | 730                        | 0.0077 | <i>Org. Electron.</i> , 2020, <b>87</b> , 105902       |
| <b>(BuPh-BDIQ)Pt<sub>2</sub>(dpm)<sub>2</sub></b>                             | 718                        | 0.0364 | <i>J. Mater. Chem. C</i> , 2018, <b>6</b> , 5769       |
| <b>1</b>                                                                      | 726                        | 0.0397 | <i>Inorg. Chem.</i> , 2018, <b>57</b> , 1298           |

|                                                                          |     |        |                                                        |
|--------------------------------------------------------------------------|-----|--------|--------------------------------------------------------|
| 2                                                                        | 738 | 0.0188 |                                                        |
| 3                                                                        | 766 | 0.0051 |                                                        |
| 4                                                                        | 777 | 0.033  |                                                        |
| 4                                                                        | 744 | 0.062  |                                                        |
| 7                                                                        | 745 | 0.046  | <i>Dyes Pigment.</i> , 2017, <b>145</b> , 144          |
| (piq) <sub>2</sub> Pt <sub>2</sub> (μ-PhOXT) <sub>2</sub>                | 702 | 0.315  |                                                        |
| (piq) <sub>2</sub> Pt <sub>2</sub> (μ-C <sub>8</sub> PhOXT) <sub>2</sub> | 703 | 0.295  | <i>J. Mater. Chem. C</i> , 2016, <b>4</b> , 6007       |
| (piq)Pt(μ-C <sub>8</sub> OXT) <sub>2</sub> Pt(piq)                       | 721 | 0.18   | <i>Org. Electron.</i> , 2012, <b>13</b> , 932          |
| 4                                                                        | 715 | 0.0005 | <i>Bull. Chem. Soc. Jpn.</i> , 2011, <b>84</b> , 219   |
| ( <i>R,S,R</i> )-Pt1                                                     | 733 | 0.206  |                                                        |
| ( <i>S,R,S</i> )-Pt1                                                     | 731 | 0.210  |                                                        |
| ( <i>R,S,R</i> )-Pt2                                                     | 780 | 0.189  | <b>This work</b>                                       |
| ( <i>S,R,S</i> )-Pt2                                                     | 775 | 0.178  |                                                        |
| <b>The reported near-infrared photoluminescent Ir(III) complexes</b>     |     |        |                                                        |
| IrFTIQ                                                                   | 738 | 0.085  | <i>Dyes Pigment.</i> , 2025, <b>232</b> , 112500       |
| Ir(Bpiq) <sub>2</sub> acac                                               | 722 | 0.35   |                                                        |
| Ir(Bpiq) <sub>2</sub> dpm                                                | 728 | 0.33   | <i>Chin. Chem. Lett.</i> , 2025, 36, 109596            |
| (Epptt) <sub>2</sub> Iracac (1)                                          | 756 | 0.124  |                                                        |
| (pptt) <sub>2</sub> Iracac (2)                                           | 796 | 0.078  | <i>Adv. Optical Mater.</i> , 2025, <b>13</b> , 2402178 |
| (ppCz) <sub>2</sub> Irtmd (3)                                            | 862 | 0.006  |                                                        |
| [Ir(dpbq) <sub>2</sub> (pbi)] (1)                                        | 783 | 0.034  |                                                        |
| [Ir(dpbq)(iqbt)(pbi)] (2)                                                | 791 | 0.042  | <i>J. Mater. Chem. C</i> , 2025, <b>13</b> , 7110      |
| [Ir(iqbt)(pbao)(acac)] (2)                                               | 719 | 0.023  | <i>J. Lumin.</i> , 2025, <b>288</b> , 121550           |

|                                                          |     |       |                                                             |
|----------------------------------------------------------|-----|-------|-------------------------------------------------------------|
| <b>[Ir(dpbq)<sub>2</sub>(L<sup>1</sup>)] (1)</b>         | 787 | 0.022 | <i>J. Lumin.</i> , 2024, <b>269</b> , 120487                |
| <b>[Ir(dpbq)<sub>2</sub>(L<sup>2</sup>)] (2)</b>         | 784 | 0.036 |                                                             |
| <b>TPAIr</b>                                             | 774 | 0.15  |                                                             |
| <b>HTIr</b>                                              | 788 | 0.09  | <i>Chem. Eng. J.</i> , 2023, <b>452</b> , 138956            |
| <b>DPTAIr</b>                                            | 798 | 0.11  |                                                             |
| <b>DTCNIr</b>                                            | 722 | 0.15  | <i>Adv. Optical Mater.</i> , 2022, <b>10</b> , 2200111      |
| <b>PTCNIr</b>                                            | 750 | 0.26  |                                                             |
| <b>BiqThIr</b>                                           | 731 | 0.68  | <i>Angew. Chem. Int. Ed.</i> , 2023, <b>62</b> , e202309739 |
| <b>BiqThIrO</b>                                          | 728 | 0.70  |                                                             |
| <b>DBPzIr</b>                                            | 746 | 0.40  | <i>Dalton Trans.</i> , 2023, <b>52</b> , 16276              |
| <b>PPzIr</b>                                             | 789 | 0.14  |                                                             |
| <b>1</b>                                                 | 712 | 0.29  | <i>J. Mater. Chem. C</i> , 2022, <b>10</b> , 3178           |
| <b>2</b>                                                 | 714 | 0.36  |                                                             |
| <b>Ir(dotbpa)<sub>3</sub></b>                            | 839 | 0.015 | <i>J. Mater. Chem. C</i> , 2020, <b>8</b> , 8484            |
| <b>Ir1</b>                                               | 712 | 0.18  |                                                             |
| <b>Ir2</b>                                               | 741 | 0.2   |                                                             |
| <b>Ir3</b>                                               | 716 | 0.25  | <i>Adv. Optical Mater.</i> , 2020, <b>8</b> , 2000154       |
| <b>Ir4</b>                                               | 728 | 0.3   |                                                             |
| <b>TCNIr</b>                                             | 708 | 0.06  | <i>Chem. Sci.</i> , 2020, <b>11</b> , 2342                  |
| <b>Ir-R</b>                                              | 732 | 0.28  | <i>J. Mater. Chem. C</i> , 2020, <b>8</b> , 7079            |
| <b>Ir-OR</b>                                             | 775 | 0.08  |                                                             |
| <b>(PPz-11,12-DO)<sub>2</sub>Iracac</b>                  | 732 | 0.13  | <i>J. Mater. Chem. C</i> , 2019, <b>7</b> , 10961           |
| <b>[(iqbt)<sub>2</sub>Ir-(btp)-Ir(iqbt)<sub>2</sub>]</b> | 722 | 0.15  | <i>J. Lumin.</i> , 2019, <b>209</b> , 427                   |

|                                             |     |       |                                                       |
|---------------------------------------------|-----|-------|-------------------------------------------------------|
| <b>Ir-3</b>                                 | 758 | 0.011 |                                                       |
|                                             |     |       | <i>J. Mater. Chem. C</i> , 2018, <b>6</b> , 10640     |
| <b>Ir-4</b>                                 | 722 | 0.106 |                                                       |
| <b><i>fac</i>-Ir(dtbpa)<sub>3</sub> (1)</b> | 824 | 0.029 |                                                       |
|                                             |     |       | <i>Chem. Mater.</i> , 2017, <b>29</b> , 4775          |
| <b><i>fac</i>-Ir(Ftbpa)<sub>3</sub> (2)</b> | 765 | 0.147 |                                                       |
| <b>[Ir(iqbt)<sub>2</sub>(dpm)] (1)</b>      | 710 | 0.16  |                                                       |
| <b>[Ir(iqbt)<sub>2</sub>(tta)] (2)</b>      | 704 | 0.07  | <i>Angew. Chem. Int. Ed.</i> , 2016, <b>55</b> , 2714 |
| <b>[Ir(iqbt)<sub>2</sub>(dtdk)] (3)</b>     | 707 | 0.14  |                                                       |
| <b>(thdpqx)<sub>2</sub>Ir(acac)</b>         | 713 | 0.149 | <i>Chem. Mater.</i> , 2015, <b>27</b> , 96            |

---

**Table S12.** Summary of photophysical properties for the chiral Pt(II) complexes.

| Complex                                                                                               | $\lambda_{\text{PL}}$<br>(nm) | PLQY  | $g_{\text{lum}}(10^{-3})$ | Ref.                                                        |
|-------------------------------------------------------------------------------------------------------|-------------------------------|-------|---------------------------|-------------------------------------------------------------|
| <i>R</i> -PtCl <sub>2</sub>                                                                           | 660                           | 0.357 | 4.0                       | <i>Inorg. Chim. Acta</i> , 2025, <b>579</b> , 122589        |
| ( <i>D,R,D</i> )/( <i>L,S,L</i> )-<br>[(L1)(L2)Pt <sub>2</sub> ( $\mu$ -itt) <sub>2</sub> ]           | 624                           | 0.127 | 0.87/-1.02                |                                                             |
| ( <i>D,R,D</i> )/( <i>L,S,L</i> )-<br>[(L2)(L3)Pt <sub>2</sub> ( $\mu$ -itt) <sub>2</sub> ]           | 666                           | 0.036 | 1.68/-2.23                |                                                             |
| ( <i>D,R,D</i> )/( <i>L,S,L</i> )-<br>[(L1) <sub>2</sub> Pt <sub>2</sub> ( $\mu$ -itt) <sub>2</sub> ] | 622                           | 0.198 | 2.58/-2.62                | <i>Org. Lett.</i> , 2025, <b>27</b> , 6971                  |
| ( <i>D,R,D</i> )/( <i>L,S,L</i> )-<br>[(L2) <sub>2</sub> Pt <sub>2</sub> ( $\mu$ -itt) <sub>2</sub> ] | 616                           | 0.114 | 1.36/-2.12                |                                                             |
| ( <i>D,R,D</i> )/( <i>L,S,L</i> )-<br>[(L3) <sub>2</sub> Pt <sub>2</sub> ( $\mu$ -itt) <sub>2</sub> ] | 694                           | 0.024 | 1.68/-1.70                |                                                             |
| <i>R,R/S,S</i>                                                                                        | ~615                          | 0.003 | $\pm 2.5$                 | <i>Chem. Lett.</i> , 2025, <b>54</b> , upaf140              |
| <i>L</i> -Pt                                                                                          | 580                           | 0.53  | 0.40                      | <i>Angew. Chem. Int. Ed.</i> , 2024, <b>63</b> , e202403898 |
| ( <i>R</i> )/( <i>S</i> )-OMOM-Me                                                                     | 660                           | 0.302 | 1.00/-0.92                |                                                             |
| ( <i>R</i> )/( <i>S</i> )-OAc-Me                                                                      | 656                           | 0.315 | 1.31/-1.32                | <i>Sci. China Chem.</i> , 2024, <b>67</b> , 3757            |
| ( <i>R</i> )/( <i>S</i> )-OMe-Me                                                                      | 665                           | 0.295 | 1.30/-1.20                |                                                             |
| <i>R</i> -ABA•[Pt(ppy)Cl <sub>2</sub> ]                                                               | 521                           | 0.199 | 1.40                      |                                                             |
| <i>S</i> -ABA•[Pt(ppy)Cl <sub>2</sub> ]                                                               | 520                           | 0.196 | -1.80                     |                                                             |
| <i>R</i> -MBA•[Pt(ppy)Cl <sub>2</sub> ]                                                               | 522                           | 0.133 | 4.40                      | <i>Mater. Horiz.</i> , 2024, <b>11</b> , 6089               |
| <i>S</i> -MBA•[Pt(ppy)Cl <sub>2</sub> ]                                                               | 523                           | 0.132 | -2.80                     |                                                             |
| <b>12a</b>                                                                                            | ~515                          |       | 5.0                       |                                                             |
| <b>12b</b>                                                                                            | ~515                          |       | 2.0                       | <i>Acc. Chem. Res.</i> , 2024, <b>57</b> , 2941             |
| ( <i>S</i> )- <b>1a</b>                                                                               | 508                           | 0.02  | 3.0                       |                                                             |
| ( <i>S</i> )- <b>1b</b>                                                                               | 512                           | 0.04  | 2.0                       |                                                             |
| ( <i>S</i> )- <b>1c</b>                                                                               | 518                           | 0.03  | 3.0                       | <i>Inorg. Chem.</i> , 2024, <b>63</b> , 23642               |
| ( <i>S</i> )- <b>2a</b>                                                                               | 555                           | <0.01 | -                         |                                                             |

|                                                            |      |        |            |                                                             |
|------------------------------------------------------------|------|--------|------------|-------------------------------------------------------------|
| <b>(S)-2b</b>                                              | 550  | <0.01  | -          |                                                             |
| <b>(S)-2c</b>                                              | 530  | <0.01  | -          |                                                             |
| <b>(R,R,R,R<sub>p</sub>,M)/(S,S,S,S<sub>p</sub>,P)-Me</b>  | 635  | 0.062  | -0.67/0.67 | <i>Inorg. Chem.</i> , 2023, <b>62</b> , 14152               |
| <b>(R,R,R,R<sub>p</sub>,M)/(S,S,S,S<sub>p</sub>,P)-iPr</b> | 635  | 0.066  | -1.09/0.89 |                                                             |
| <b>R-Pt</b>                                                | 621  | 0.0046 | 3.4        | <i>Chem. Commun.</i> , 2023, <b>59</b> , 4004               |
| <b>S-Pt</b>                                                | 621  | 0.0055 | -2.3       |                                                             |
| <b>(L,S,L)Pt4a</b>                                         | 622  | 0.198  | -1.21      | <i>Angew. Chem. Int. Ed.</i> , 2023, <b>62</b> , e202302011 |
| <b>(L,S,L)Pt4b</b>                                         | 617  | 0.215  | -4.13      |                                                             |
| <b>1</b>                                                   | 520  | 0.05   | 0.67       | <i>ChemPhotoChem</i> , 2023, <b>7</b> , e202300010          |
| <b>(RR)(SS)-Py-Pt</b>                                      | ~550 | 0.0672 | -0.77/0.63 | <i>Chin. Chem. Lett.</i> , 2022, <b>33</b> , 1459           |
| <b>(RR)(SS)-P/M-QPt</b>                                    | ~634 | 0.0199 | -3.5/3.1   |                                                             |
| <b>(R)-Cy-A</b>                                            | 605  | 0.152  | 2.0        |                                                             |
| <b>(R,R,R)-BINA-A</b>                                      | 520  | 0.342  | 2.4        | <i>J. Am. Chem. Soc.</i> , 2022, <b>144</b> , 2233          |
| <b>(R,R,R)-BINA-B</b>                                      | 718  | 0.081  | 1.0        |                                                             |
| <b>trans-[Pt(ppy)(D-tac)]</b>                              | 521  | -      | <0.2       | <i>Inorg. Chem.</i> , 2022, <b>61</b> , 17154               |
| <b>cis-[Pt(ppy)(D-tac)]</b>                                | 521  | -      | <0.2       |                                                             |
| <b>trans-[Pt(ppy)(D-pbc)]</b>                              | 518  | -      | <0.2       |                                                             |
| <b>cis-[Pt(ppy)(D-pbc)]</b>                                | 550  | -      | <0.2       |                                                             |
| <b>(S,S)-1</b>                                             | 533  | 0.10   | 1.0        | <i>Chem. Lett.</i> 2022, <b>51</b> , 832                    |
| <b>(S,S)-2</b>                                             | 575  | 0.05   | 0.8        |                                                             |
| <b>R-NCN</b>                                               | 523  | 0.200  | 0.10       |                                                             |
| <b>S-NCN</b>                                               | 523  | 0.196  | 0.10       | <i>J. Organomet. Chem.</i> , 2022, <b>973-974</b> , 122394. |
| <b>Phen-NCN</b>                                            | 530  | 0.224  | 0.10       |                                                             |

|                                               |     |       |       |                                                                |
|-----------------------------------------------|-----|-------|-------|----------------------------------------------------------------|
| <b><i>P</i>-Pt</b>                            | 650 | -     | -6.0  | <i>Front. Chem.</i> , 2020, <b>8</b> , 501                     |
| <b><i>M</i>-Pt</b>                            | 650 | -     | 6.0   |                                                                |
| <b>(<i>R</i>)/(<i>S</i>)-BP1</b>              | 645 | 0.32  | ±1.3  | <i>ACS Appl. Mater. Interfaces</i> ,<br>2020, <b>12</b> , 9520 |
| <b>(<i>R</i>)/(<i>S</i>)-BP2</b>              | 639 | 0.12  | ±1.0  |                                                                |
| <b>[Pt(iqbt)(<i>S</i>-L<sup>1</sup>)] (1)</b> | 731 | 0.13  | -2.14 | <i>J. Mater. Chem. C</i> , 2019, <b>7</b> ,<br>13743           |
| <b>[Pt(iqbt)(<i>S</i>-L<sup>2</sup>)] (2)</b> | 729 | 0.21  | 2.04  |                                                                |
| <b>[Pt(iqbt)(<i>S</i>-L<sup>2</sup>)] (3)</b> | 730 | 0.16  | -1.76 |                                                                |
| <b>[Pt(iqbt)(<i>S</i>-L<sup>2</sup>)] (4)</b> | 731 | 0.14  | -2.75 |                                                                |
| <b>(<i>R,S,R</i>)-Pt1</b>                     | 709 | 0.354 | -2.8  | <b>This work</b>                                               |
| <b>(<i>S,R,S</i>)-Pt1</b>                     | 708 | 0.342 | 2.7   |                                                                |
| <b>(<i>R,S,R</i>)-Pt2</b>                     | 792 | 0.292 | -3.9  |                                                                |
| <b>(<i>S,R,S</i>)-Pt2</b>                     | 794 | 0.285 | 3.8   |                                                                |

---

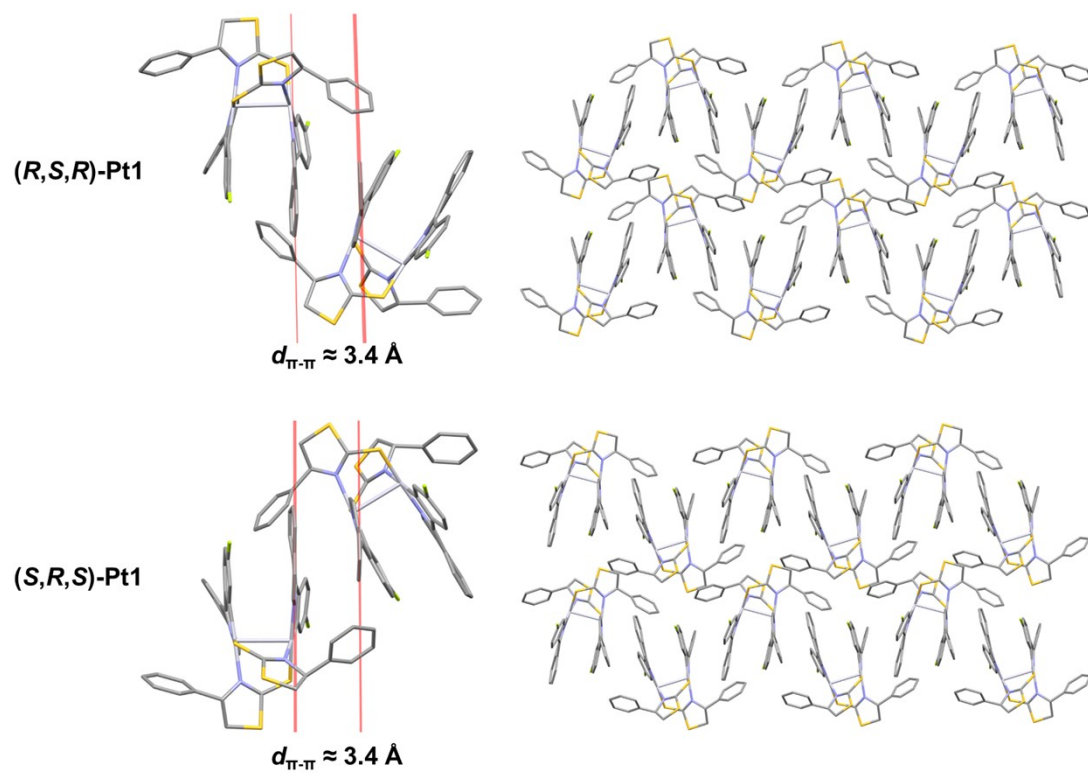

**Figure S1.** The molecular stacking and intermolecular  $\pi \cdots \pi$  interactions between molecules in the crystals of (*R,S,R*)/(*S,R,S*)-Pt1.

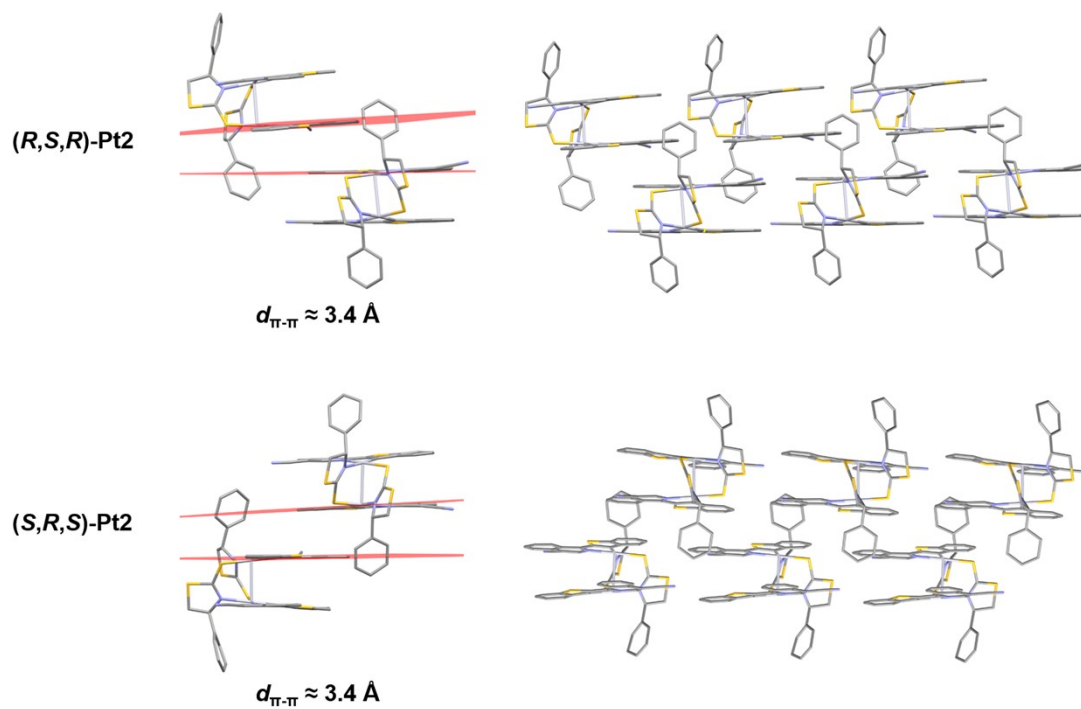

**Figure S2.** The molecular stacking and intermolecular  $\pi \cdots \pi$  interactions between molecules in the crystals of  $(R,S,R)/(S,R,S)$ -Pt2.

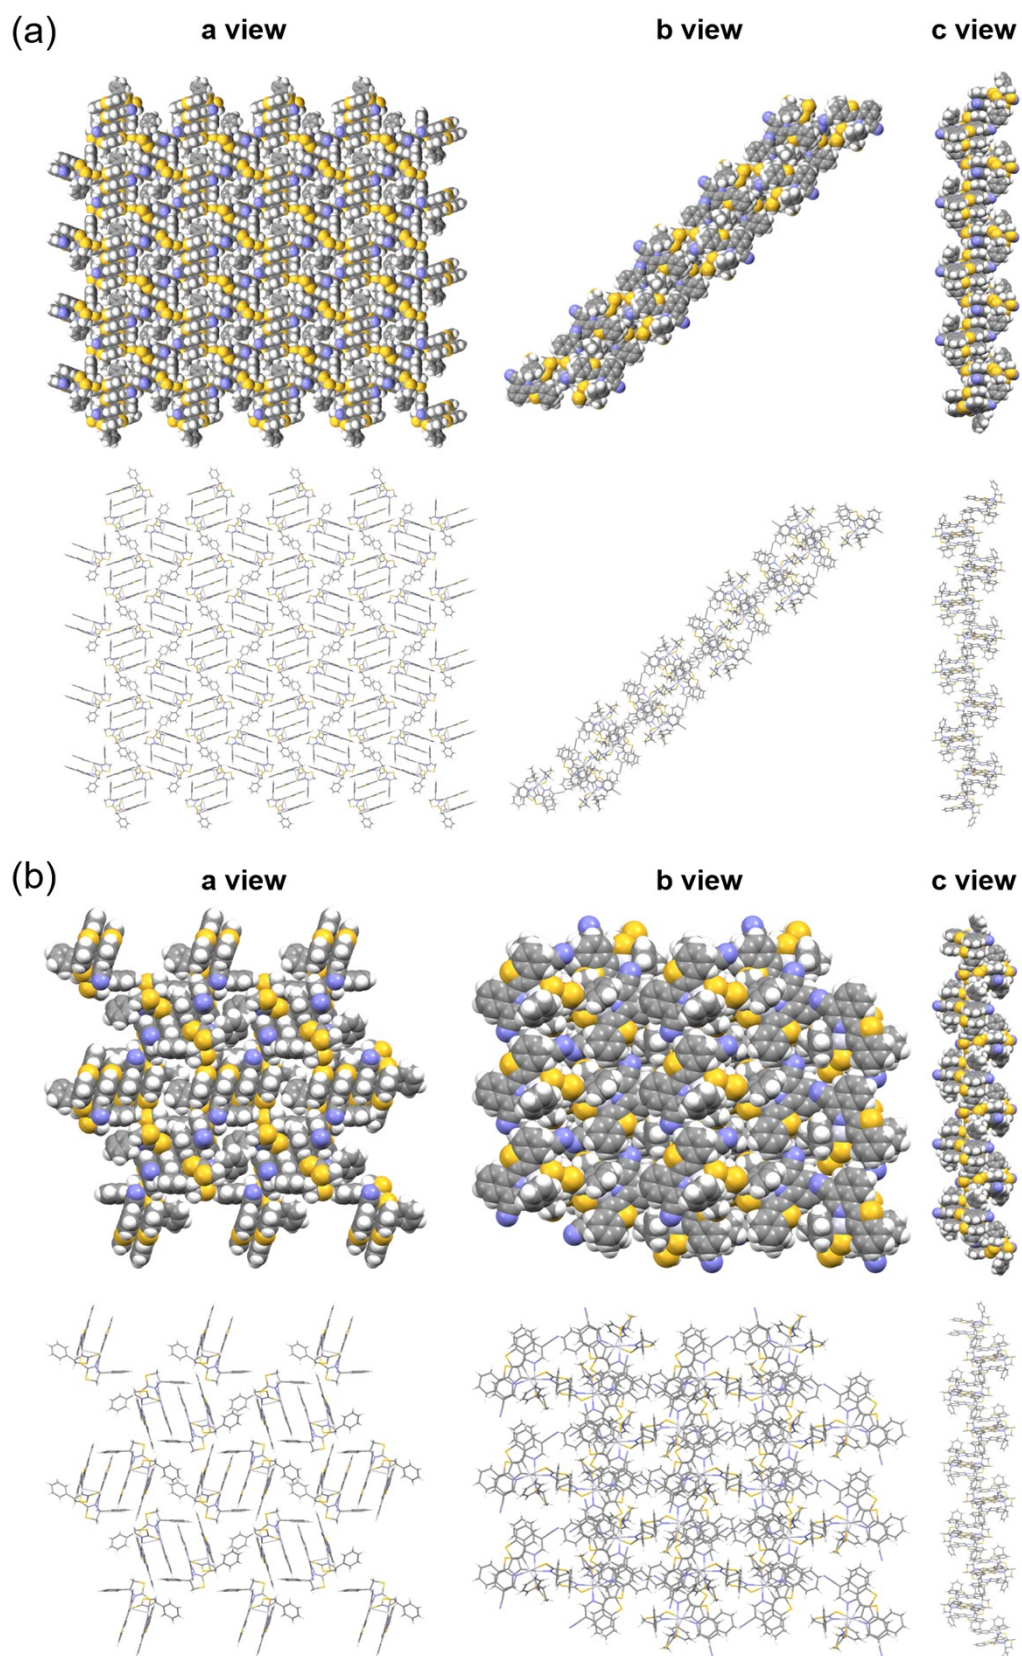

**Figure S3.** Molecular stacking in crystals of (a) *(R,S,R)*-Pt<sub>2</sub> and (b) *(S,R,S)*-Pt<sub>2</sub> with different view direction.

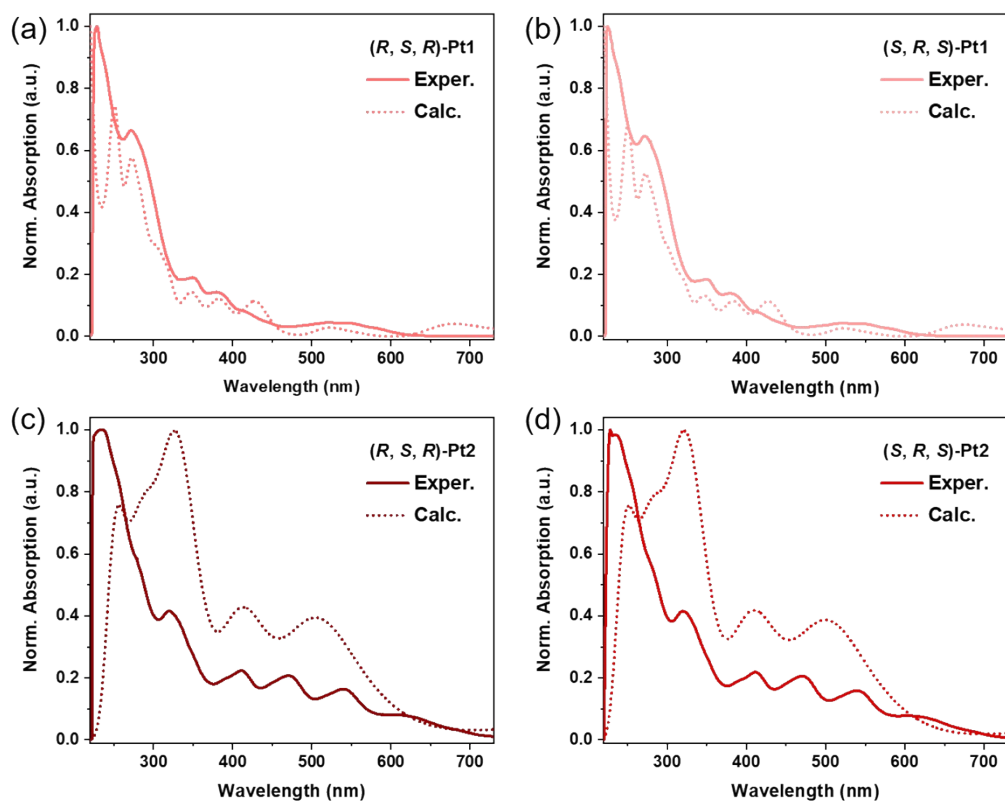

**Figure S4.** Experimental and calculated absorption spectra of Pt(II) complexes in  $\text{CH}_2\text{Cl}_2$ .

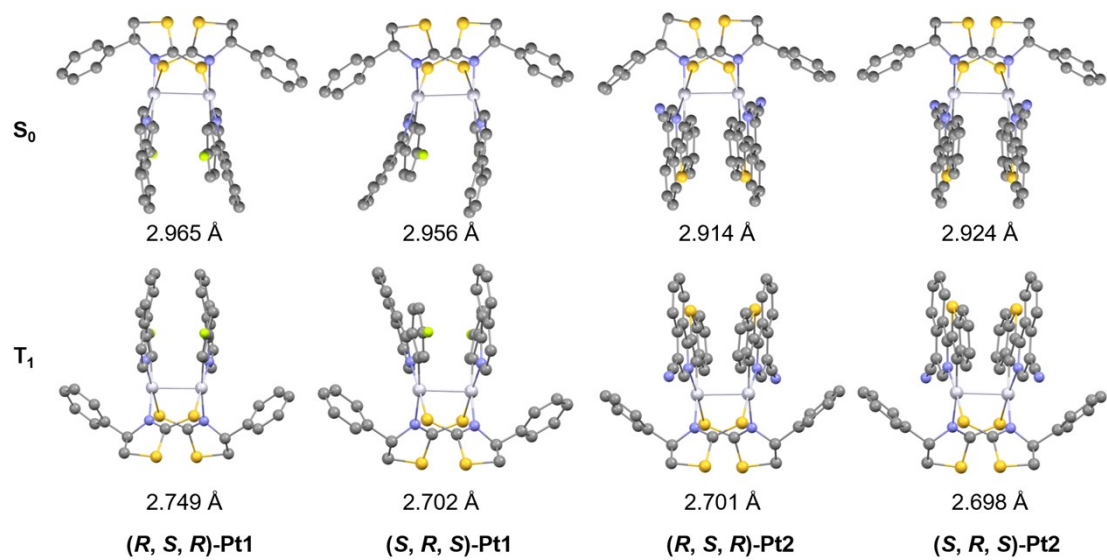

**Figure S5.** Optimized  $S_0$  and  $T_1$  geometries of Pt(II) complexes and their Pt-Pt distances.

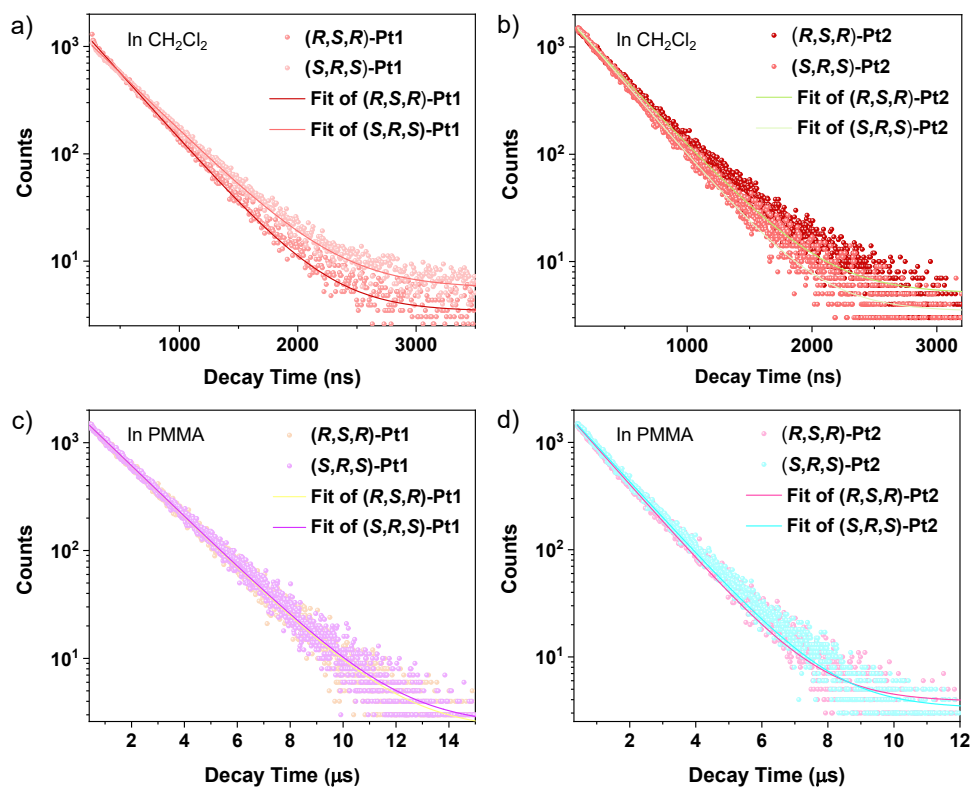

Figure S6. PL decay curves of Pt(II) complexes in degassed  $\text{CH}_2\text{Cl}_2$  at  $1 \times 10^{-5}$  M (a,b) and 5 wt% PMMA film (c,d) at room temperature under the excitation of a 375 nm-laser.

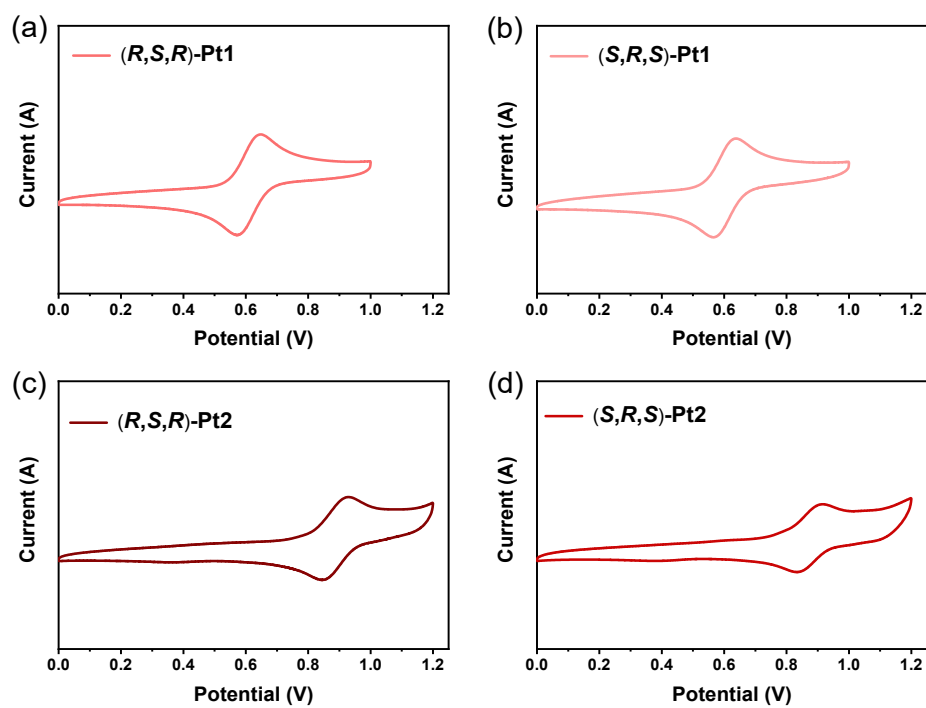

**Figure S7.** Cyclic voltammety curves of Pt(II) complexes in CH<sub>3</sub>CN with ferrocene as the internal standard under a scan rate of 100 mV/s.

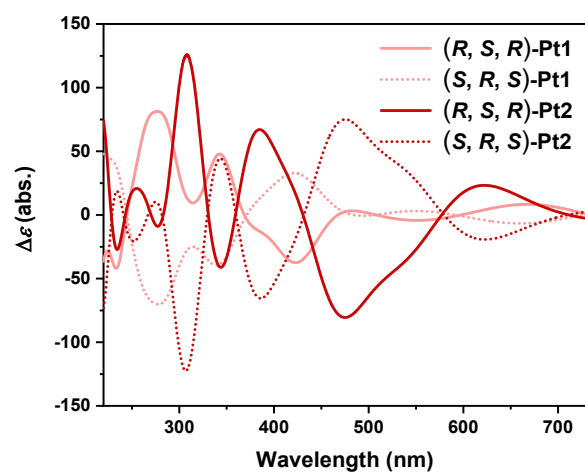

**Figure S8.** The calculated CD spectra for Pt(II) complexes.

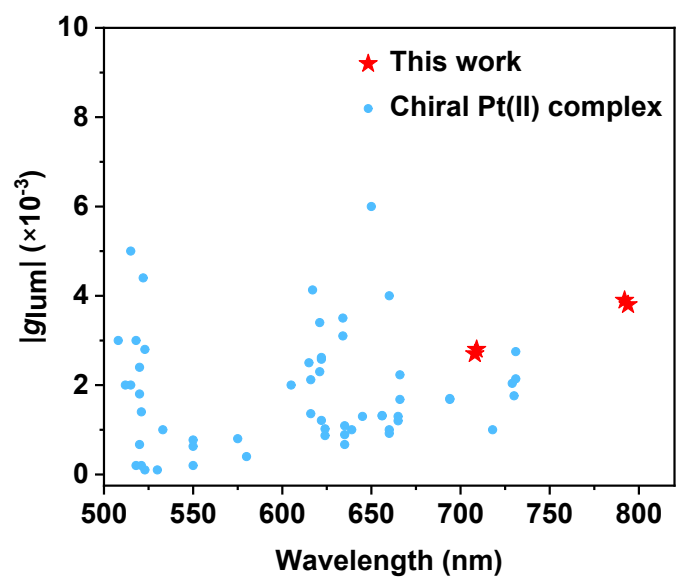

**Figure S9.** Comparison of  $g_{lum}$  of designed Pt(II) complexes with the reported chiral Pt(II) complexes.

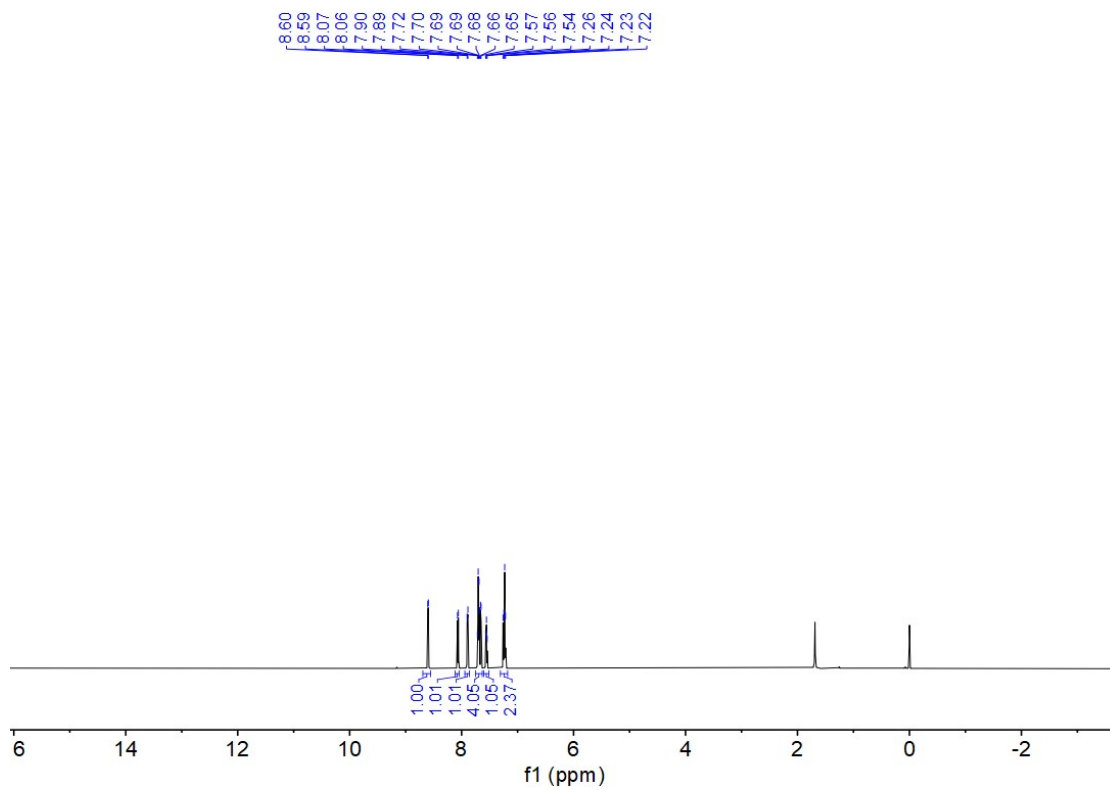

**Figure S10.** <sup>1</sup>H NMR spectrum for F-Hpiq in CDCl<sub>3</sub> at room temperature.

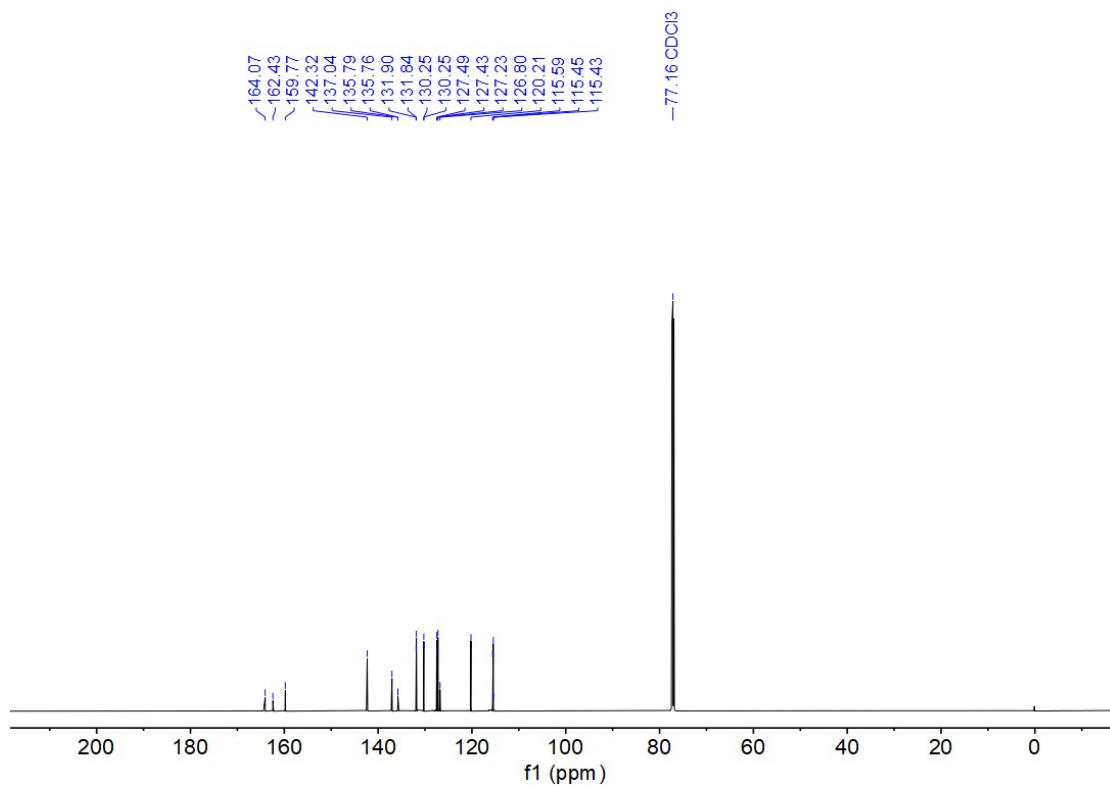

**Figure S11.**  $^{13}\text{C}\{^1\text{H}\}$  NMR spectrum for F-Hpiq in  $\text{CDCl}_3$  at room temperature.

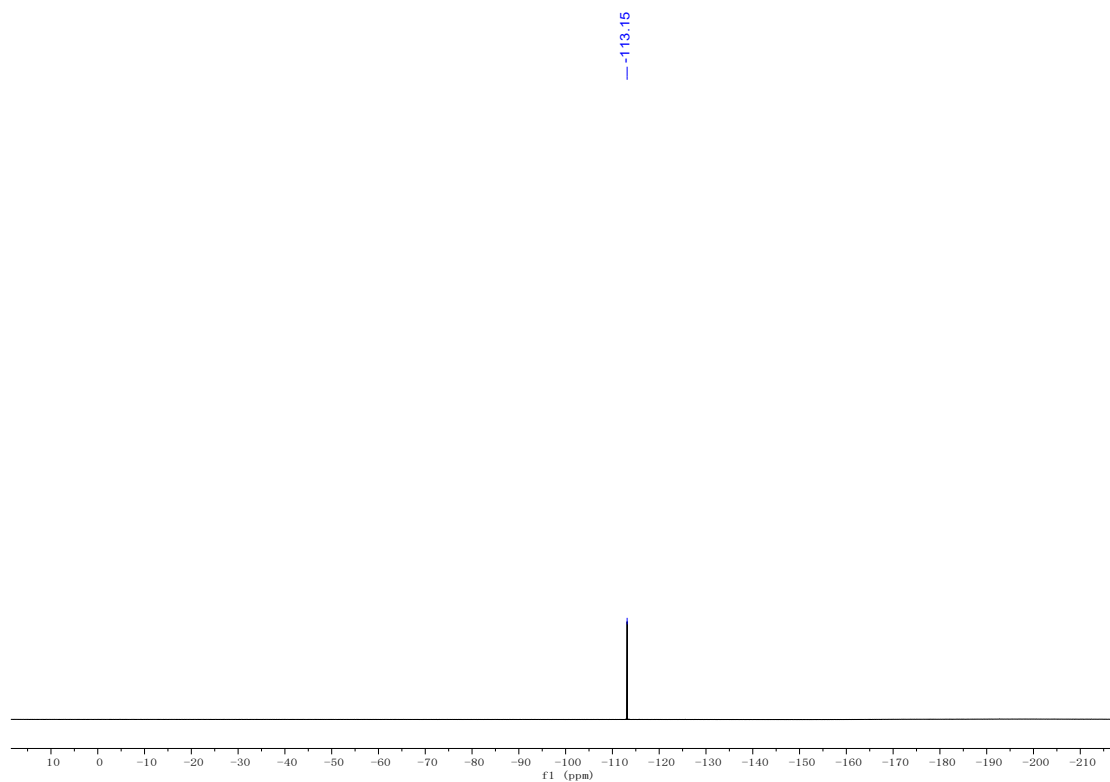

**Figure S12.**  $^{19}\text{F}\{^1\text{H}\}$  NMR spectrum for F-Hpiq in  $\text{CDCl}_3$  at room temperature.

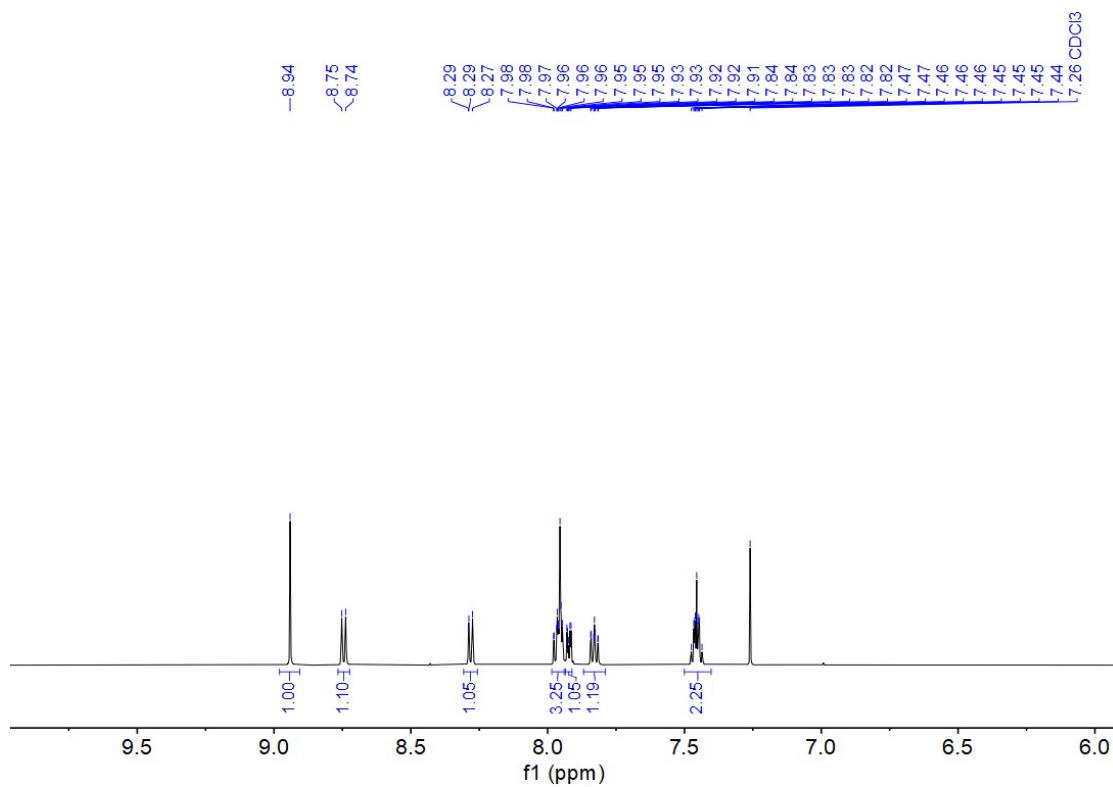

**Figure S13.** <sup>1</sup>H NMR spectrum for CN-Hiqt in CDCl<sub>3</sub> at room temperature.

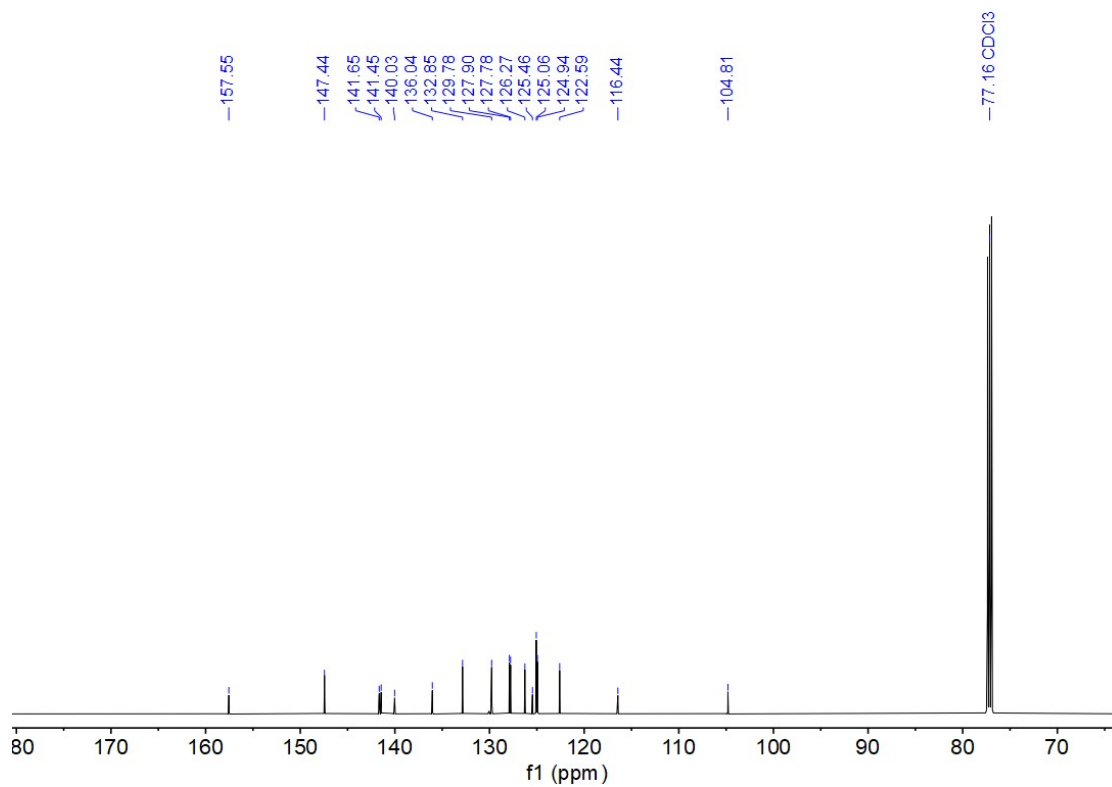

**Figure S14.**  $^{13}\text{C}\{^1\text{H}\}$  NMR spectrum for CN-Hiqbt in  $\text{CDCl}_3$  at room temperature.

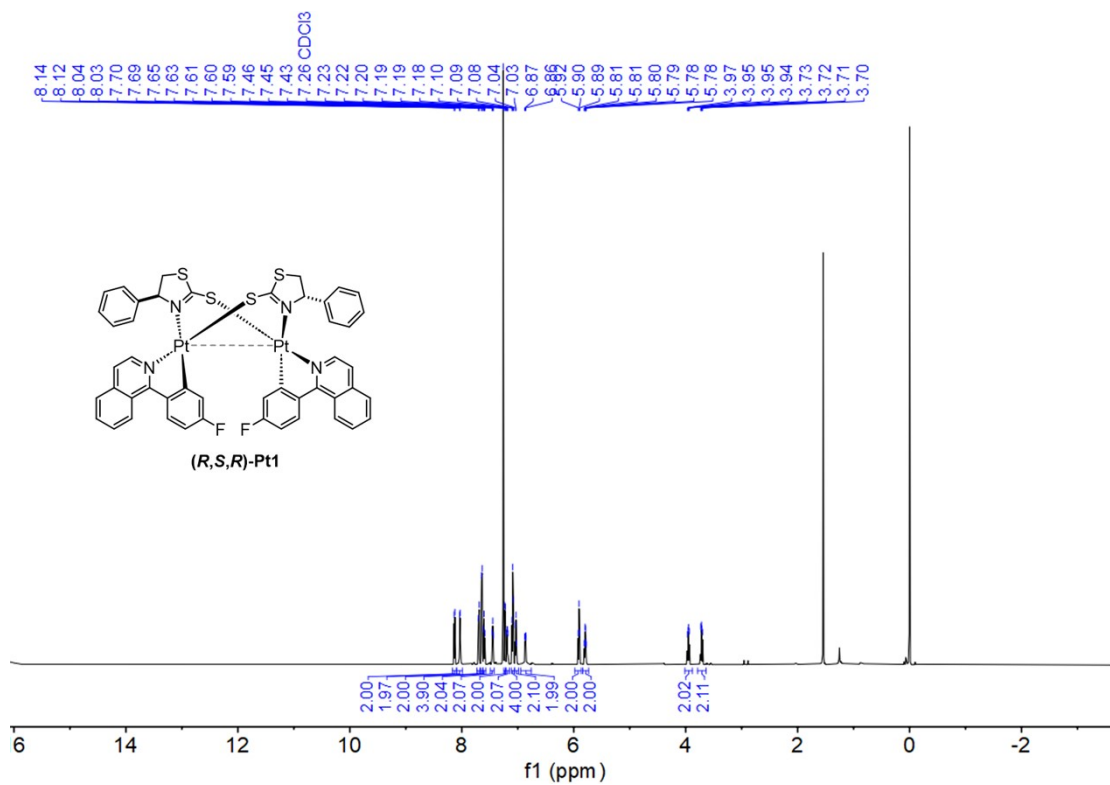

**Figure S15.**  $^1\text{H}$  NMR spectrum for **(R,S,R)-Pt1** in  $\text{CDCl}_3$  at room temperature.

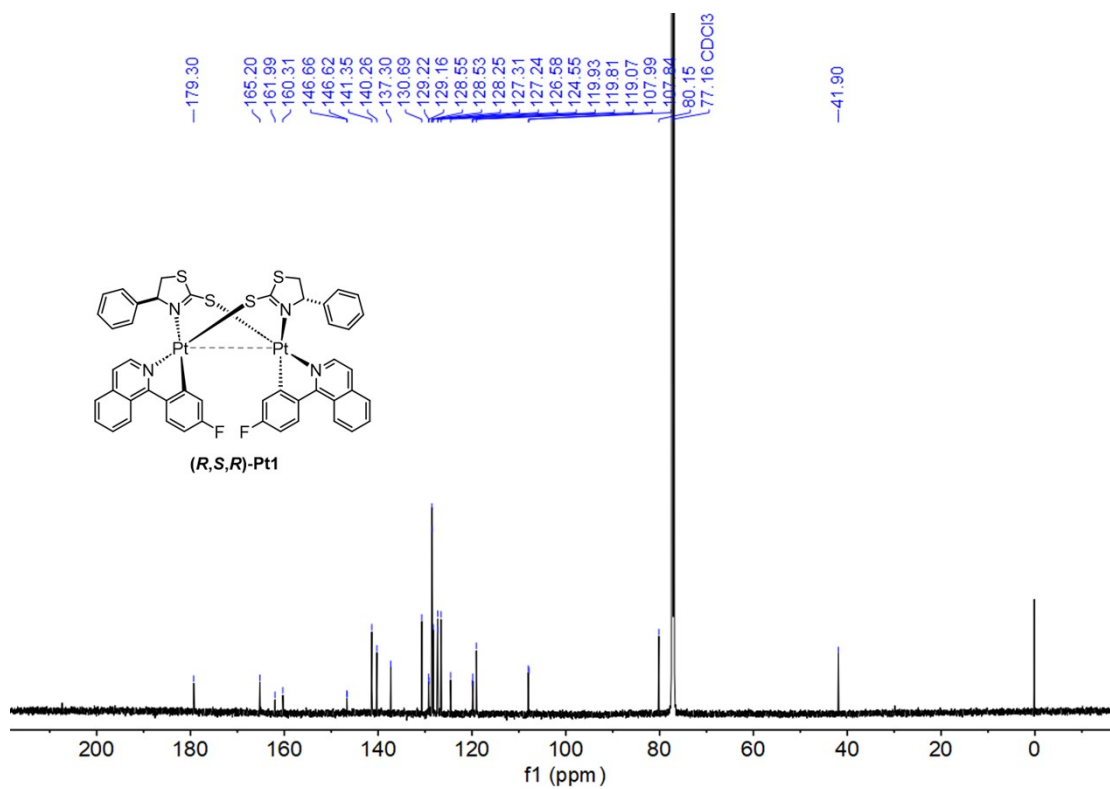

**Figure S16.**  $^{13}\text{C}\{^1\text{H}\}$  NMR spectrum for **(R,S,R)-Pt1** in  $\text{CDCl}_3$  at room temperature.

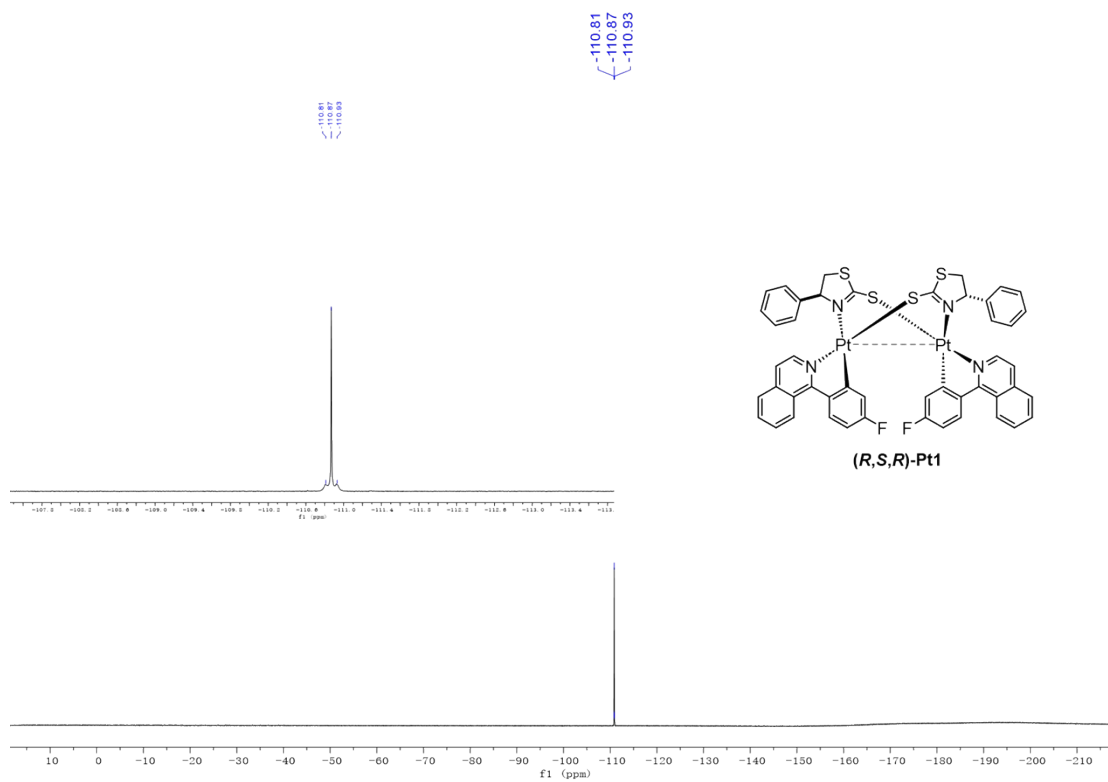

**Figure S17.**  $^{19}\text{F}\{^1\text{H}\}$  NMR spectrum for  $(R,S,R)\text{-Pt1}$  in  $\text{CDCl}_3$  at room temperature.

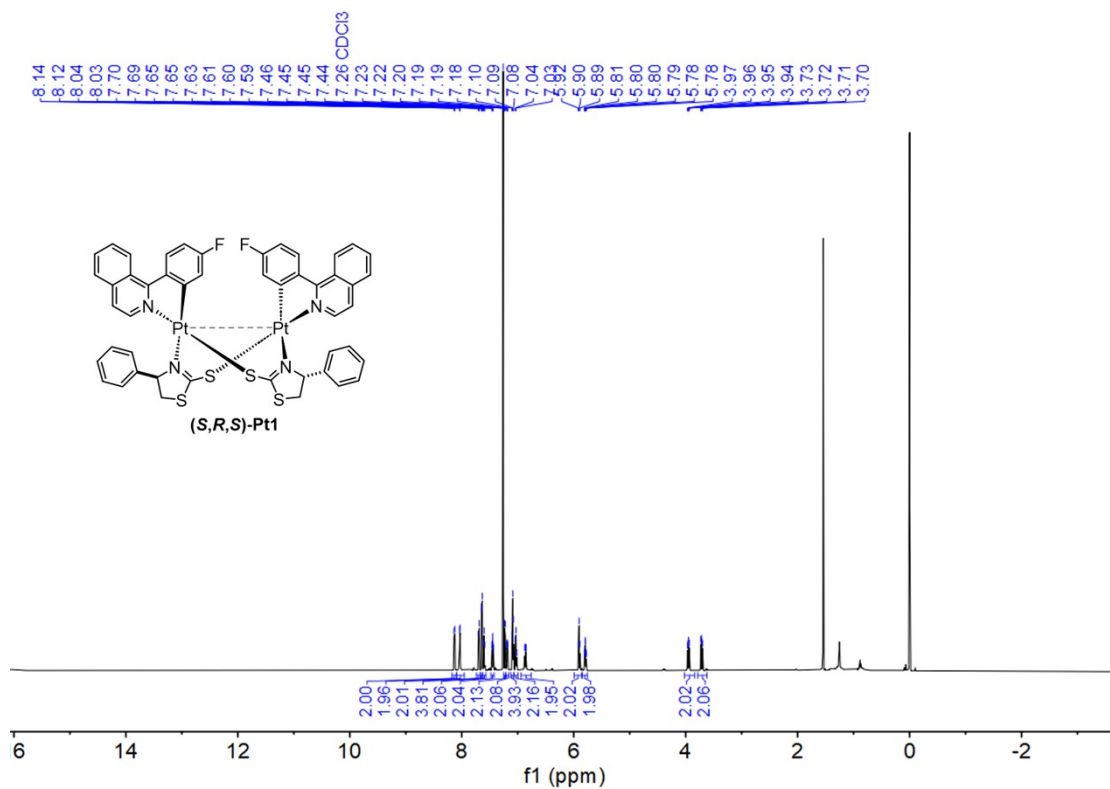

**Figure S18.** <sup>1</sup>H NMR spectrum for **(S,R,S)-Pt1** in CDCl<sub>3</sub> at room temperature.

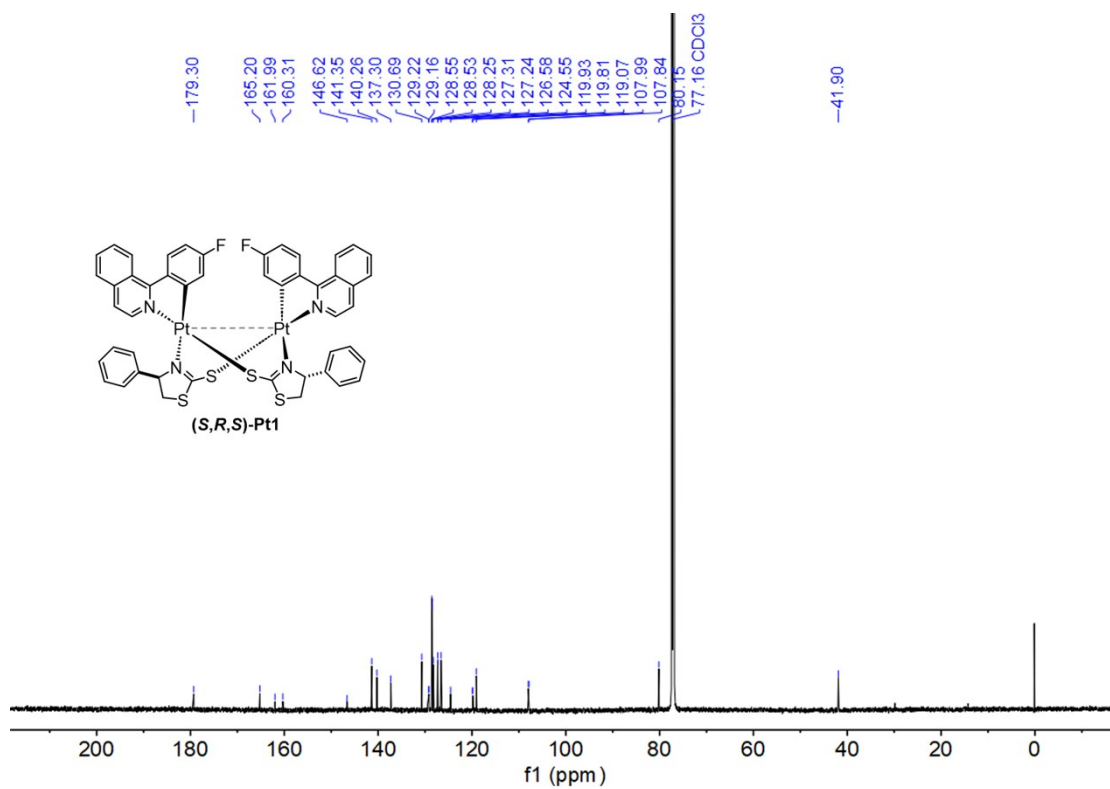

**Figure S19.**  $^{13}\text{C}\{^1\text{H}\}$  NMR spectrum for **(S,R,S)-Pt1** in  $\text{CDCl}_3$  at room temperature.

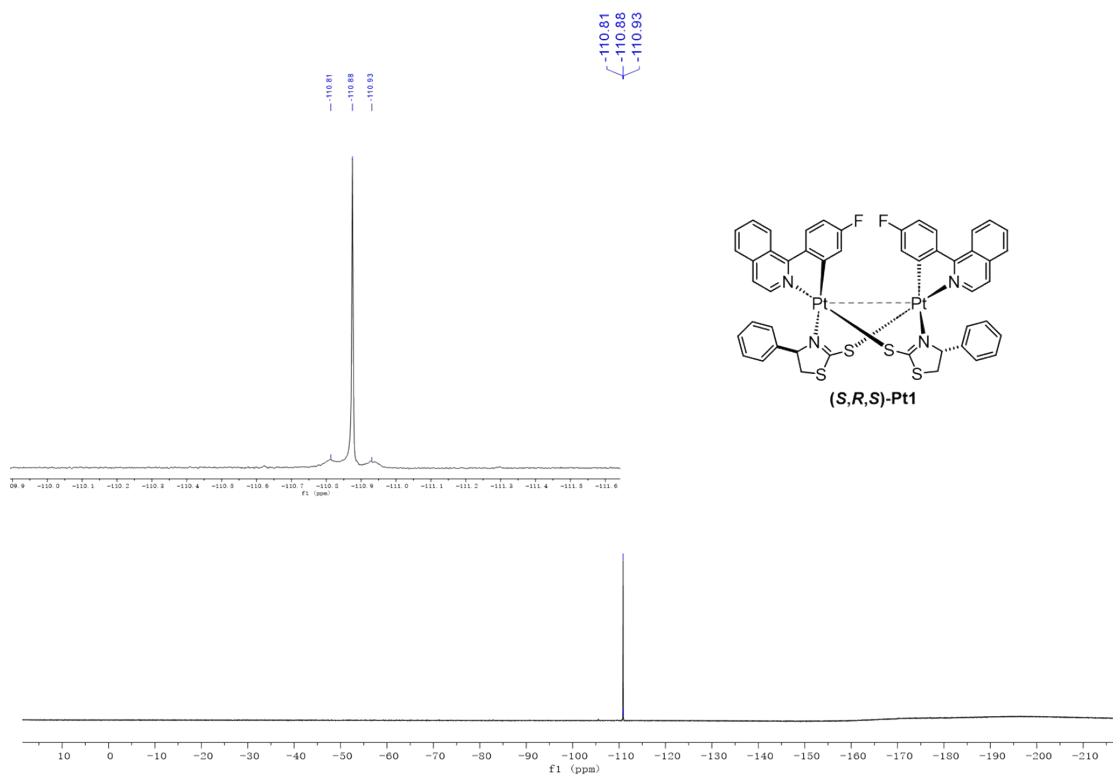

**Figure S20.**  $^{19}\text{F}\{^1\text{H}\}$  NMR spectrum for  $(S,R,S)\text{-Pt1}$  in  $\text{CDCl}_3$  at room temperature.

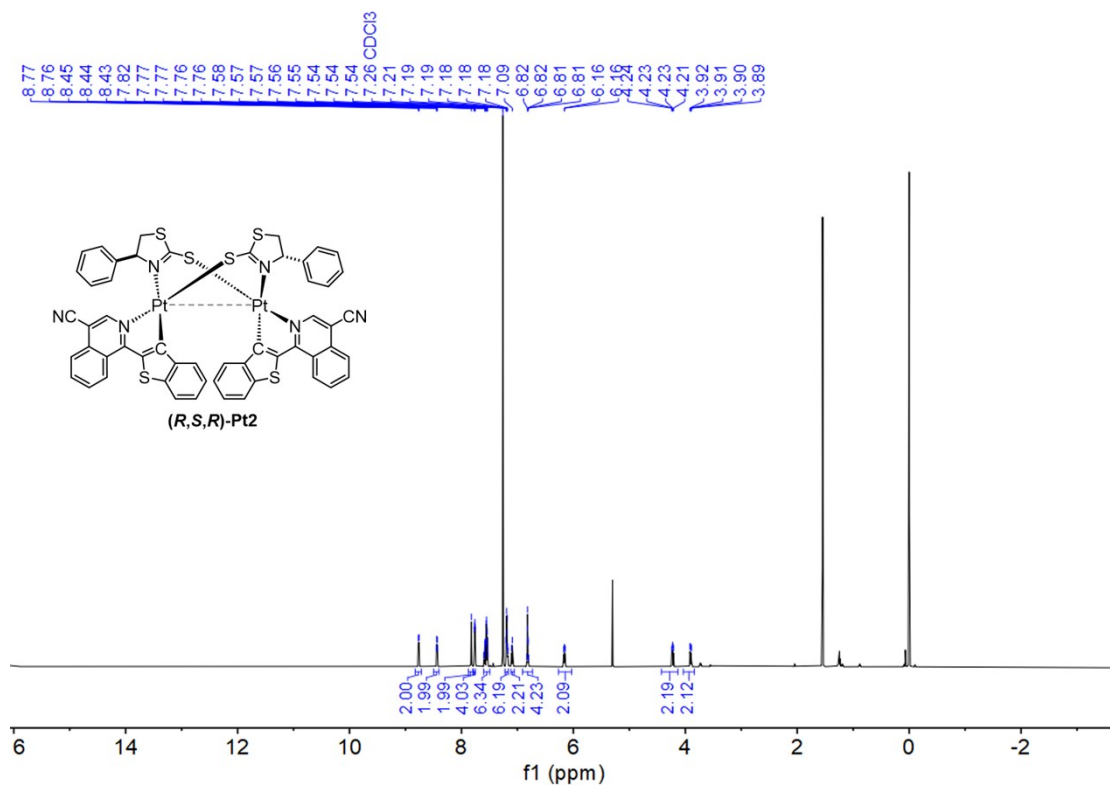

**Figure S21.** <sup>1</sup>H NMR spectrum for **(R,S,R)-Pt2** in CDCl<sub>3</sub> at room temperature.

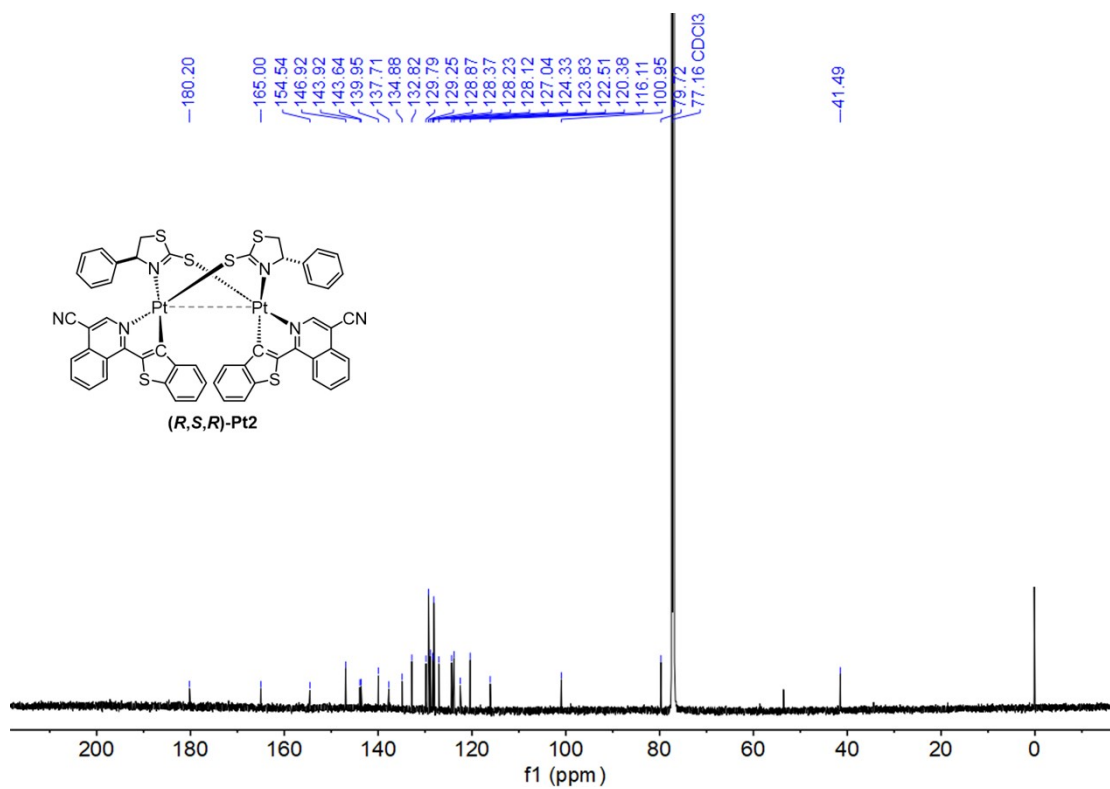

**Figure S22.**  $^{13}\text{C}\{^1\text{H}\}$  NMR spectrum for  $(R,S,R)\text{-Pt}2$  in  $\text{CDCl}_3$  at room temperature.

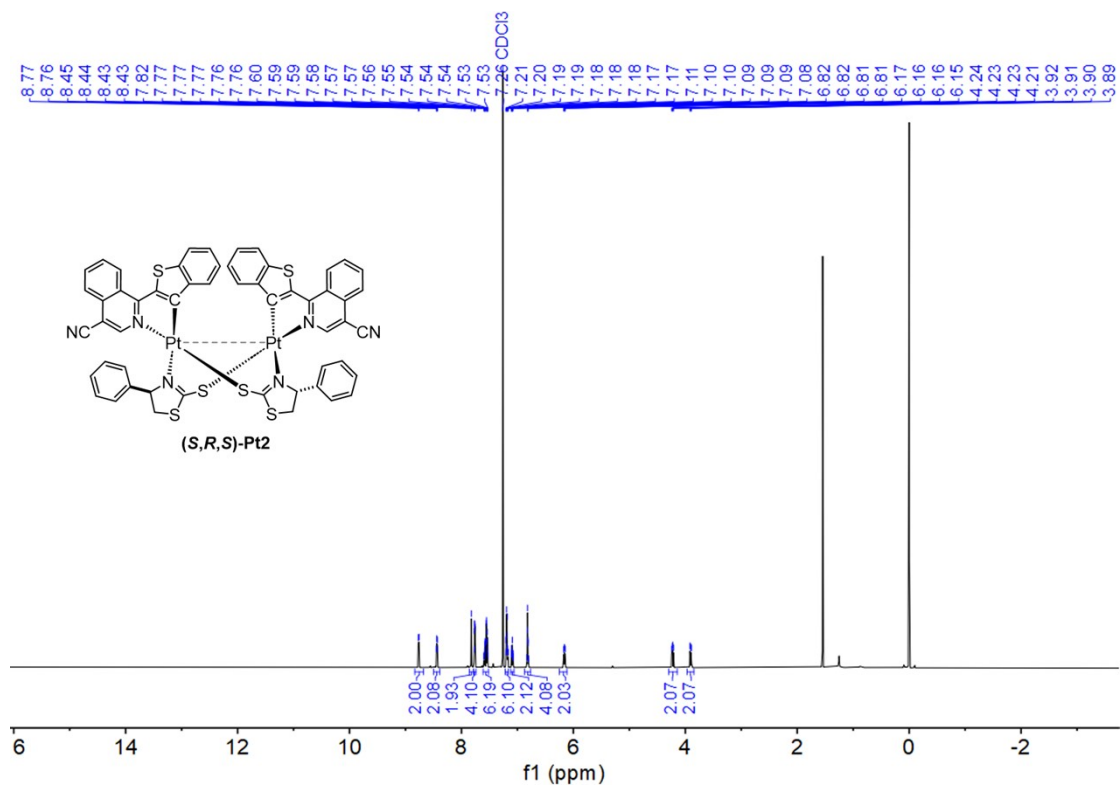

**Figure S23.** <sup>1</sup>H NMR spectrum for (S,R,S)-Pt<sub>2</sub> in CDCl<sub>3</sub> at room temperature.

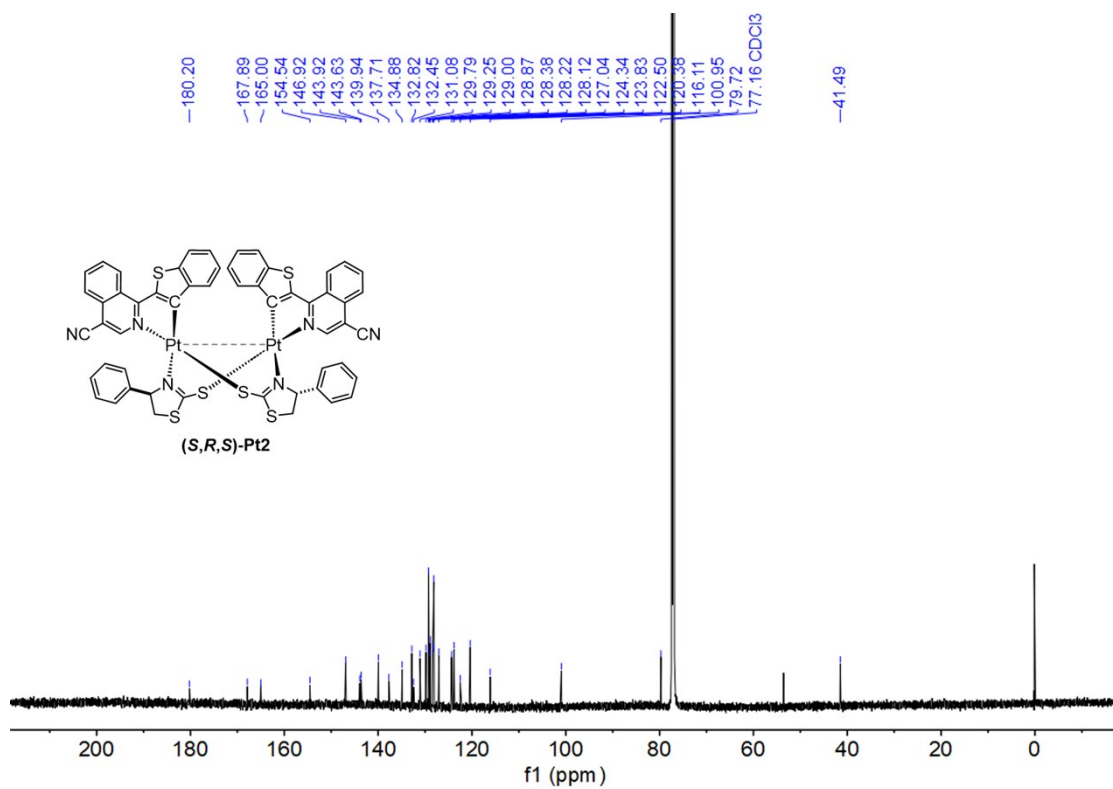

**Figure S24.**  $^{13}\text{C}\{^1\text{H}\}$  NMR spectrum for **(S,R,S)-Pt2** in  $\text{CDCl}_3$  at room temperature.

# Spectrum Plot Report

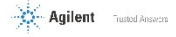

|                |     |              |         |            |                 |                   |                      |
|----------------|-----|--------------|---------|------------|-----------------|-------------------|----------------------|
| Name           | 0   | Rack Pos.    |         | Instrument | Instrument 1    | Operator          |                      |
| Inj. Vol. (ul) | 2   | Plate Pos.   |         | IRM Status | All ions missed | Acq. Time (Local) | 4/2/2026 10:38:41 AM |
| Data File      | F.d | Method (Acq) | ceshi.m | Comment    |                 | (UTC+08:00)       |                      |

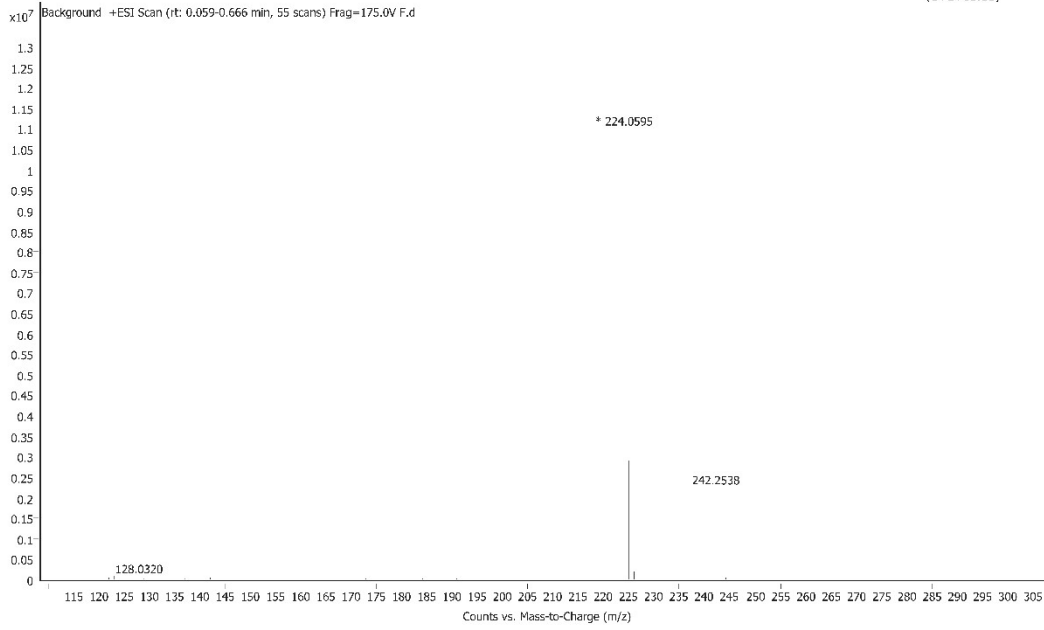

**Figure S25.** The mass spectrum for **F-Hpiq**.

# Spectrum Plot Report

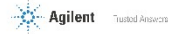

|                |       |              |         |            |                 |                   |                      |
|----------------|-------|--------------|---------|------------|-----------------|-------------------|----------------------|
| Name           | 0     | Rack Pos.    |         | Instrument | Instrument 1    | Operator          |                      |
| Inj. Vol. (ul) | 2     | Plate Pos.   |         | IRM Status | All ions missed | Acq. Time (Local) | 4/2/2026 10:40:54 AM |
| Data File      | CNT.d | Method (Acq) | ceshi.m | Comment    |                 | (UTC+08:00)       |                      |

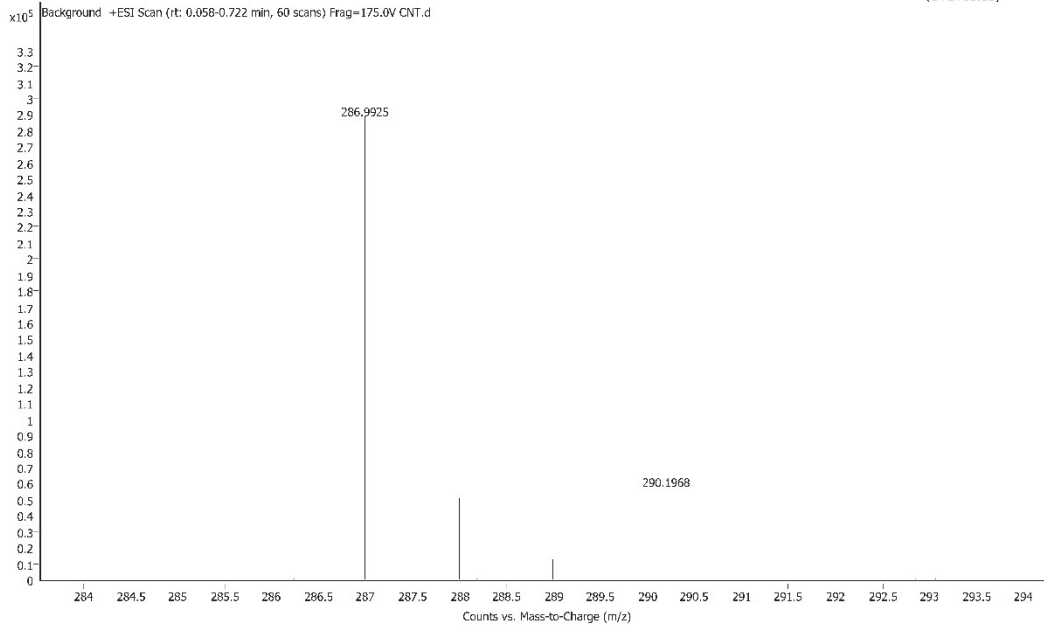

**Figure S26.** The mass spectrum for CN-Hiqbt.

# Spectrum Plot Report

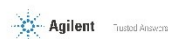

|                |       |              |         |            |              |                   |                                   |
|----------------|-------|--------------|---------|------------|--------------|-------------------|-----------------------------------|
| Name           | 0     | Rack Pos.    |         | Instrument | Instrument 1 | Operator          |                                   |
| Inj. Vol. (ul) | 2     | Plate Pos.   |         | IRM Status | Success      | Acq. Time (Local) | 3/25/2026 10:20:08 AM (UTC+08:00) |
| Data File      | 2-1.d | Method (Acq) | ceshi.m | Comment    |              |                   |                                   |

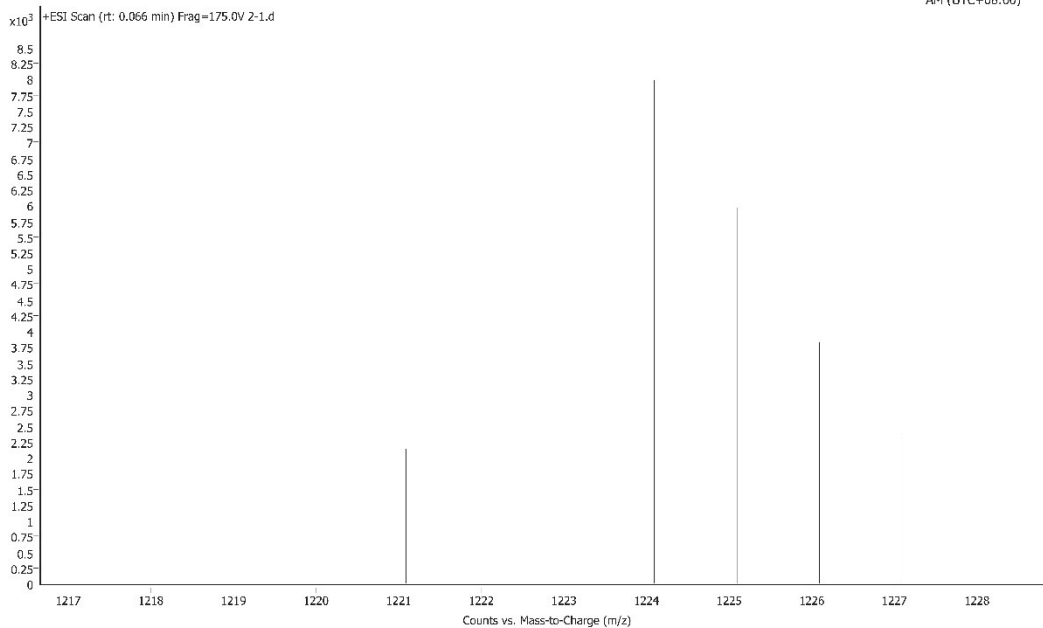

**Figure S27.** The mass spectrum for *(R,S,R)*-Pt1.

# Spectrum Plot Report



|                |       |              |         |            |              |                   |                                   |
|----------------|-------|--------------|---------|------------|--------------|-------------------|-----------------------------------|
| Name           | 0     | Rack Pos.    |         | Instrument | Instrument 1 | Operator          |                                   |
| Inj. Vol. (ul) | 2     | Plate Pos.   |         | IRM Status | Success      | Acq. Time (Local) | 3/25/2026 10:53:05 AM (UTC+08:00) |
| Data File      | 2-2.d | Method (Acq) | ceshi.m | Comment    |              |                   |                                   |

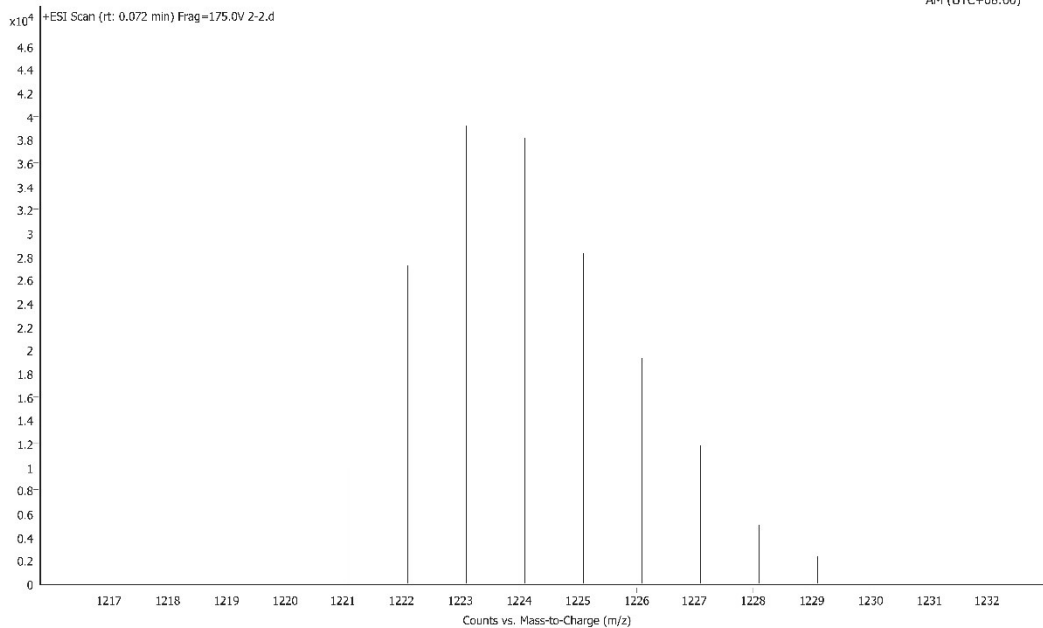

**Figure S28.** The mass spectrum for **(S,R,S)-Pt1**.

# Spectrum Plot Report

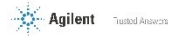

|                |         |              |         |            |              |                   |                      |
|----------------|---------|--------------|---------|------------|--------------|-------------------|----------------------|
| Name           | 0       | Rack Pos.    |         | Instrument | Instrument 1 | Operator          |                      |
| Inj. Vol. (ul) | 2       | Plate Pos.   |         | IRM Status | Success      | Acq. Time (Local) | 3/25/2026 3:41:04 PM |
| Data File      | 2-4-1.d | Method (Acq) | ceshi.m | Comment    |              | (UTC+08:00)       |                      |

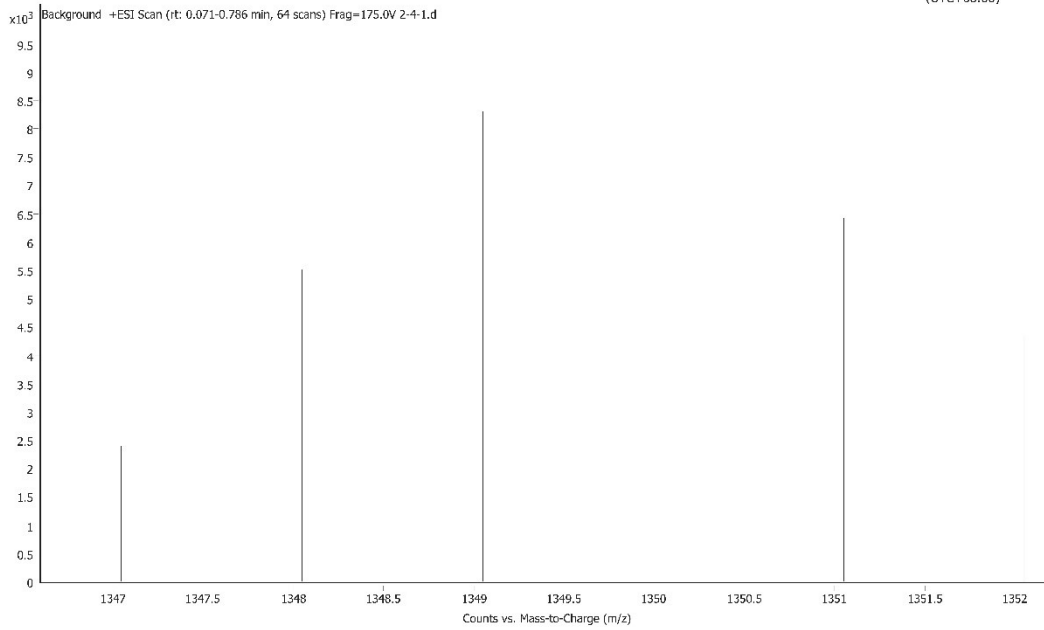

**Figure S29.** The mass spectrum for **(R,S,R)-Pt2**.

# Spectrum Plot Report



|                |       |              |         |            |              |                   |                                   |
|----------------|-------|--------------|---------|------------|--------------|-------------------|-----------------------------------|
| Name           | 0     | Rack Pos.    |         | Instrument | Instrument 1 | Operator          |                                   |
| Inj. Vol. (ul) | 2     | Plate Pos.   |         | IRM Status | Success      |                   |                                   |
| Data File      | Z-4.d | Method (Acq) | ceshi.m | Comment    |              | Acq. Time (Local) | 3/25/2026 10:59:57 AM (UTC+08:00) |

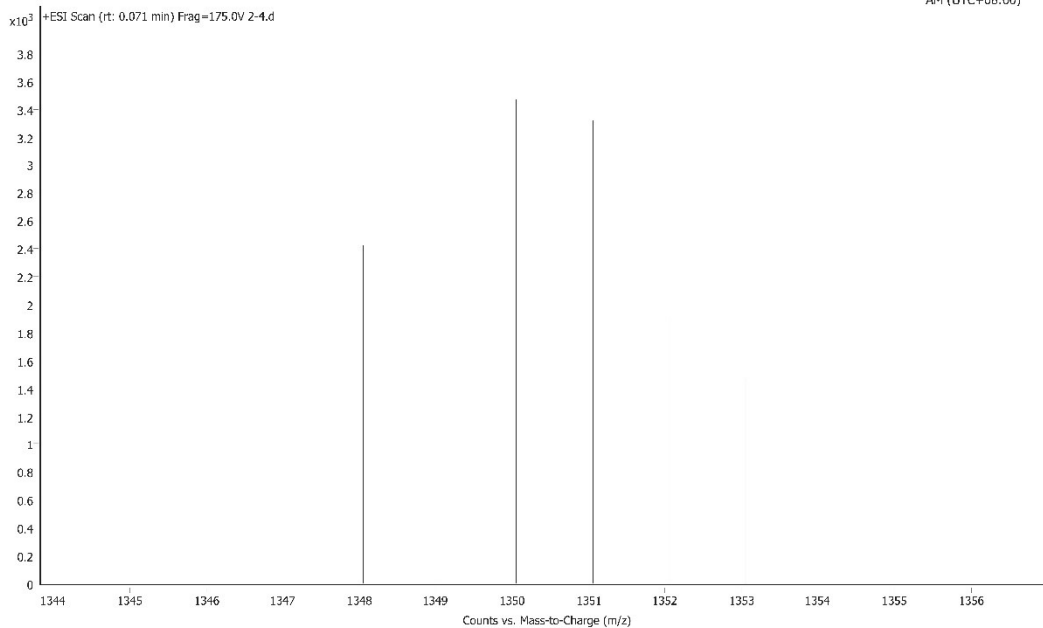

**Figure S30.** The mass spectrum for **(S,R,S)-Pt2**.

## Supplementary References

- (1) Sheldrick, G. M., A short history of SHELX. *Acta Crystallogr. Sect. A* **2008**, *64*, 112-122.
- (2) Sheldrick, G. M., Crystal structure refinement with SHELXL. *Acta Crystallogr. Sect. C-Struct. Chem.* **2015**, *71*, 3-8.
- (3) Lübben, J.; Wandtke, C. M.; Hübschle, C. B.; Ruf, M.; Sheldrick, G. M.; Dittrich, B., Aspherical scattering factors for SHELXL—model, implementation and application. *Acta Crystallogr. Sect. A* **2019**, *75*, 50-62.
- (4) Zysman-Colman, E.; Ghosh, S. S.; Xie, G.; Varghese, S.; Chowdhury, M.; Sharma, N.; Cordes, D. B.; Slawin, A. M. Z.; Samuel, I. D. W., Solution-processable silicon phthalocyanines in electroluminescent and photovoltaic devices. *ACS Appl. Mater. Interfaces* **2016**, *8*, 9247-9253.
- (5) Chen, H.-Y.; Chen, C.-T.; Chen, C.-T., Synthesis and characterization of a new series of blue fluorescent 2,6-linked 9,10-diphenylanthrylenephenylene copolymers and their application for polymer light-emitting diodes. *Macromolecules* **2010**, *43*, 3613-3623.
- (6) Weigend, F.; Ahlrichs, R., Balanced basis sets of split valence, triple zeta valence and quadruple zeta valence quality for H to Rn: Design and assessment of accuracy. *Phys. Chem. Chem. Phys.* **2005**, *7*, 3297-3305.
- (7) Weigend, F., Accurate Coulomb-fitting basis sets for H to Rn. *Phys. Chem. Chem. Phys.* **2006**, *8*, 1057-1065.
- (8) Weigend, F., Hartree–Fock exchange fitting basis sets for H to Rn. *J. Comput. Chem.* **2008**, *29*, 167-175.
- (9) Greenfield, J. L.; Wade, J.; Brandt, J. R.; Shi, X.; Penfold, T. J.; Fuchter, M. J., Pathways to increase the dissymmetry in the interaction of chiral light and chiral molecules. *Chem. Sci.* **2021**, *12*, 8589-8602.
- (10) Wang, D.; Chen, X.; Yang, H.; Zhong, D.; Liu, B.; Yang, X.; Yue, L.; Zhou, G.; Ma, M.; Wu, Z., The synthesis of cyclometalated platinum(II) complexes with benzoaryl-pyridines as C<sup>N</sup> ligands for investigating their photophysical, electrochemical and electroluminescent properties. *Dalton Trans.* **2020**, *49*, 15633-15645.
